1 **Feeding intervention potentiates the effect of mechanical loading to induce new bone**  
2 **formation in mice**

3 Hasmik Jasmine Samvelyan<sup>1,2,3</sup>, John Cummings Mathers<sup>1,4</sup>, Timothy Michael Skerry<sup>1,2,\*</sup>

4 <sup>1</sup> MRC-Versus Arthritis Centre for Integrated Research into Musculoskeletal Ageing

5 <sup>2</sup> Mellanby Centre for Bone Research, Department of Oncology and Metabolism, The  
6 Medical School, The University of Sheffield, Beech Hill Road, Sheffield, , UK

7 <sup>3</sup> Present address: Centre for Stress and Age-Related Disease, School of Pharmacy and  
8 Biomolecular Studies, University of Brighton, Brighton, BN2 4GJ, UK. E-mail:  
9 [h.samvelyan@brighton.ac.uk](mailto:h.samvelyan@brighton.ac.uk) (<https://orcid.org/0000-0001-9576-8001>)

10 <sup>4</sup> Human Nutrition Research Centre, Centre for Healthier Lives, Population Health Sciences  
11 Institute, Newcastle University, Framlington Place, Newcastle upon Tyne, NE2 4HH, UK. E-  
12 mail: [john.mathers@newcastle.ac.uk](mailto:john.mathers@newcastle.ac.uk) (<https://orcid.org/0000-0003-3406-3002>)

13 \*Corresponding author; Timothy M Skerry (Department of Oncology and Metabolism, The  
14 Medical School, The University of Sheffield, Beech Hill Road, Sheffield, S10, 2RX, UK, Tel:  
15 +44 (0) 114 215 9026) E-mail: [t.skerry@sheffield.ac.uk](mailto:t.skerry@sheffield.ac.uk) (<https://orcid.org/0000-0003-1319-5575>)  
16

17 **Classification**

18 Biological Sciences, Medical Sciences

19 **Keywords**

20 bone, exercise, loading, energy metabolism, endocrinology

21

22

23

24

25

26

27

28

### **Abstract**

29 The benefits of increased human lifespan depend upon duration of healthy, independent living; the  
30 healthspan. Bone-wasting disorders contribute significantly to loss of independence, frailty and  
31 morbidity in older people. Therefore, there is an unmet need globally for lifestyle interventions to  
32 reduce the likelihood of bone fractures with age. Although many mechanisms are involved in disorders  
33 of bone loss, there is no single regulatory pathway and, therefore, there is no single treatment  
34 available to prevent their occurrence. Our aim in these studies was to determine whether  
35 fasting/feeding interventions alter the effect of mechanical loading on bone anabolic activities and  
36 increase bone mass. In young 17-week-old mice, 16-hour fasting period followed by reintroduction of  
37 food for 2 hours increased markedly the potency of mechanical loading, that mimics the effect of  
38 exercise, to induce new cortical bone formation. Consistent with this finding, fasting and re-feeding  
39 increased the response of bone to a loading stimulus that, alone, does not stimulate new bone  
40 formation in ad-lib fed mice. Older mice (20-months) experienced no potentiation of loading-induced  
41 bone formation with the same timing of feeding interventions. Interestingly, the pre-, prandial and  
42 postprandial endocrine responses in older mice were different from those in young animals. The  
43 hormones that change in response to timing of feeding have osteogenic effects that interact with  
44 loading-mediated effects. Our findings indicate associations between timing of food ingestion and  
45 bone adaptation to loading. If translated to humans, such non-pharmacological lifestyle interventions  
46 may benefit skeletal health of humans throughout life-course and in older age.

47

### **Significance statement**

48 Here we report a significant translational finding in ageing research and bone biology. The effect  
49 of mechanical loading on bone is increased in mice by altering timing of a fasting/feeding  
50 intervention. We show that a fast and reintroduction of food results in a 36% increase in  
51 mechanically-induced bone formation. Furthermore, the intervention transforms a mechanical  
52 stimulus that is ineffective alone in inducing bone formation into one that does. In humans, a  
53 similar potentiation of the effect of exercise following, but not preceding eating has been reported.  
54 As it is hard for people to exercise vigorously as they age, there is a need to identify more effective  
55 ways to exercise for maximum benefits to the musculoskeletal system.

56

57

58

59

60

61

62

63

64

65

66

67

68

69

70

71 **Introduction**

72 The dramatic increase in human life expectancy in the last 60 years has been driven by reduced deaths of  
73 people in their 60s and 70s, leading to demographic shifts so that most populations globally are  
74 characterised by increasing numbers of older old people(1). However, an increasing number of these extra  
75 years of life are spent in poor health with more years spent in care facilities due to reduced ability to live  
76 independently. Osteoporosis is a major contributor to loss of independence due to bone fractures, and  
77 resulting hospital treatments lead to significant morbidity. Even after successful fracture treatment,  
78 independent living is compromised in many patients(2). While drug treatments reduce consequences of  
79 osteoporosis significantly, there is a pressing need for non-pharmacological interventions to improve bone  
80 health across the life-course and to reduce likelihood of age-related bone disease.

81 Physical activity is beneficial for the skeleton acting through the process of functional adaptation, a process  
82 that is less effective in older animals and humans than young ones(3–6). In addition, older people and those  
83 with bone loss, who are already at increased risk of fractures, may be unable to perform exercise that is  
84 sufficiently vigorous to strengthen their bones. Since dietary interventions such as energy (caloric) restriction  
85 are associated with healthy ageing, a combination of exercise and nutrition may benefit bone health in  
86 ageing by utilising synergies between osteotropic influences.

87 Increased physical activity is beneficial for the skeleton by reducing the rate of age-related loss of bone mass  
88 through shifting the balance of bone remodelling in favour of bone formation(7). However, during ageing  
89 skeletal resorption rates are increased with decrease in bone formation rates, resulting in overall net bone  
90 loss(8). Therefore, it is hard for elderly adults and patients with bone wasting disorders to perform vigorous  
91 exercise safely, and there is a need to identify effective ways for those people to exercise which produce  
92 maximum benefits for the musculoskeletal system without increased risk of injury.

93 There is complex and coordinated relationship between the endocrine regulation of energy metabolism,  
94 adipose tissue and bone homeostasis(9–12). Specifically, concentrations of hormones including ghrelin,  
95 leptin, insulin, amylin, incretins, GIP, GLP1 and GLP2 change profoundly in anticipation of, during or after  
96 eating (preprandial, prandial and postprandial responses). These hormones have anabolic effects on bone  
97 homeostasis, therefore, synergies between endocrine and mechanical effects could alter with changes in  
98 concentrations of these hormones. Indeed, previous studies in model organisms provide evidence of  
99 synergistic effects of one of the osteoregulatory hormones; parathyroid hormone and mechanical loading on  
100 bone. Parathyroid hormone administration alone induces bone formation but, in combination with mechanical  
101 loading, enhances mechanically-induced bone formation synergistically(13–17).

102 In this study, we have investigated the synergistic effect of feeding interventions following an overnight fast  
103 on the response of bone to mechanical loading in mice and the concurrent role of candidate osteotropic  
104 hormones in bone homeostasis. Using a well-established tibial axial loading model(18, 19), we performed  
105 experiments to determine osteogenic effects of different mechanical loading regimens after periods of  
106 withholding food (fasting) or feeding in young (17-19 week-old) and aged (20-month-old) male C57BL/6  
107 mice. We measured new bone formation in these mice using micro-computed tomography and dynamic  
108 histomorphometry. To explore possible mechanisms by which fasting/feeding interventions could have their  
109 effect, we measured changes in serum concentrations of a range of candidate osteotropic hormones in  
110 response to feeding in fed and fasted fed young and aged mice using a multiplex assay.

111 **Results**

112 **The effect of 16-hour food restriction on feeding behaviour of male mice**

113 To establish a robust model to study the effect of timing of feeding on bone's response to loading, we first  
114 assessed the effect of overnight, 16-hour food removal on subsequent feeding behaviour of young (17-18  
115 weeks old) and aged (20-month-old) male C57BL/6 mice. The results provided insights into dynamics of the  
116 homeostatic feeding response and showed that both young adult (Fig. 1a) and aged (Fig. 1b) male mice  
117 exhibited a similar 2-hour hyperphagic response following fasting before returning to the same food intake as  
118 mice that had unrestricted access to a normal chow ad libitum for the whole period of experiment (Fig. 1a, b).

119 **Feeding intervention potentiates adaptive response of the bones to mechanical loading in young mice**

120  
121 Next we compared bone formation responses in ad-lib fed animals and in mice fasted overnight and then  
122 allowed free access to maintenance diet for 1, 2 or 3 hours before loading. To mimic osteogenic exercise,  
123 compressive forces were applied between the hock (ankle) and stifle (knee) joints to induce deformation of  
124 the tibiae. Different loading regimens comprised 40 cycles of compressive force at high physiological strain  
125 rate to peak strain magnitudes of 2200, 1300 or 1100 microstrain, followed by a brief hold of 0.25 seconds,  
126 and a rapid symmetrical reduction in loading, with a 9 second rest period before the next compression. The  
127 three strain magnitudes corresponded to maximal, sub-maximal and sub-threshold stimuli respectively.  
128 Loading was applied on Monday, Wednesday and Friday of 2 successive weeks, at 1, 2 or 3 hours after food  
129 had been re-introduced to 16-hour fasted mice, or at the same time of day in ad-lib fed animals  
130 (Supplementary Fig. S1).

131 Using a high resolution  $\mu$ CT analysis of the cortical bone at the mid-shaft region of loaded tibiae, we found  
132 the expected responses to loading at high physiological strains with significant adaptive response in the  
133 mice fed ad-lib. However, in mice that were fasted then fed for 2 hours, the change in cortical bone thickness  
134 induced by maximal loading was increased by 36% compared with responses of mice fed ad-lib before the  
135 loading ( $0.049 \pm 0.007\text{mm}$  in fasted/fed loaded tibiae compared with that in ad-lib fed mice  $0.036 \pm$   
136  $0.004\text{mm}$ ,  $p < 0.05$ ) (Fig. 2a, c, d). The histomorphometric data were consistent with the  $\mu$ CT measurements  
137 (Fig. 2b, Table 1). Colour-coded analysis revealed anatomical variation in cortical bone thickness between  
138 loaded and non-loaded tibiae of fasted fed and ad-lib fed mice (Fig. 2d). Differences in the cortical bone  
139 thickness of loaded tibiae were particularly apparent between fasted/fed and ad-lib fed mice and correlated  
140 with  $\mu$ CT analysis. There was no significant induction of bone formation in non-loaded legs of either ad-lib or  
141 fasted/fed mice over the period of the experiment.  
142 In animals fed for 1 or 3 hours after the end of fasting, the mean cortical thickness increased compared with  
143 ad lib-fed controls, but the difference was not significant. Trabecular bone parameters were improved by  
144 loading in both fasted and ad-lib fed groups and at all 3 times after re-introduction of food, but were not  
145 significantly different between feeding interventions.

#### 146 **Load magnitude-related adaptive response of the cortical bone is potentiated by feeding intervention** 147 **in young mice**

148 We then determined effects of fasting and 2-hour feeding regimen on bone response to loading which, in ad-  
149 lib fed mice, induced less than maximal bone formation. In mice, whose bones were loaded to induce peak  
150 strain magnitudes of 1300 microstrain, a sub-maximal stimulus, loading after fasting and feeding increased  
151 cortical thickness by 13% compared with ad-lib fed mice (fasted/fed:  $0.27 \pm 0.007\text{mm}$  loaded limb versus  
152  $0.24 \pm 0.003\text{mm}$  control limb,  $p < 0.05$ ; ad-lib fed:  $0.26 \pm 0.004\text{mm}$  versus  $0.24 \pm 0.004\text{mm}$ ,  $p < 0.05$ ) (Fig.  
153 3b). Finally, we investigated the effects of a sub-threshold stimulus (1100 microstrain), not capable of  
154 inducing new bone formation in ad-lib fed mice. Remarkably, that previously ineffective stimulus together  
155 with imposition of the fasting/re-feeding regimen resulted in an 8% increase in cortical thickness (fasted/fed:  
156  $0.26 \pm 0.008\text{mm}$  loaded limb versus  $0.24 \pm 0.008\text{mm}$  control limb,  $p < 0.05$ ; ad-lib fed:  $0.26 \pm 0.002\text{mm}$   
157 versus  $0.25 \pm 0.004\text{mm}$ ,  $p > 0.05$ ) (Fig. 3a). We did not detect significant changes in trabecular bone  
158 parameters in these studies.

#### 159 **Adaptive response of bones to mechanical loading in aged mice is not potentiated by the same** 160 **feeding intervention that is effective in young mice**

161 We then compared effects of fasting/feeding regimens on load-induced bone formation in older 20-month-old  
162 mice, but observed no potentiation effect of loading of the fasting and 2 hour feeding regimen that we had  
163 seen in younger mice (cortical bone thickness fasted/fed:  $0.23 \pm 0.002\text{mm}$  loaded limb versus  $0.21 \pm$   
164  $0.004\text{mm}$  control limb,  $p < 0.05$ ; ad-lib fed:  $0.24 \pm 0.01\text{mm}$  versus  $0.21 \pm 0.007\text{mm}$ ,  $p < 0.05$ ) (Fig. 4a-c).  
165 Colour-coded analysis revealed no anatomical variation in cortical bone thickness between loaded and non-  
166 loaded tibiae of fasted fed and ad-lib fed aged mice (Fig. 4c).  
167 Despite deterioration of the trabecular bone in these aged mice, trabecular bone pattern factor decreased  
168 significantly in both fed and fasted 2-hour fed mice (fasted/fed:  $-2.3 \pm 4.3\text{mm}^{-1}$  loaded limb versus  $20.8 \pm$   
169  $3.3\text{mm}^{-1}$  control limb,  $p < 0.001$ ; ad-lib fed:  $0.7 \pm 3.7\text{mm}^{-1}$  versus  $17.3 \pm 1.5\text{mm}^{-1}$ ,  $p < 0.01$ ) (Fig. 4d). Similarly,  
170 there was no significant change of bone formation in non-loaded legs of either ad-lib or fasted/fed aged mice  
171 over the period of the experiment.

#### 172 **Regulation of bone homeostasis by endocrine hormones differ between young and aged mice**

173 Next we assessed changes in circulating concentrations of gastro-entero-pancreatic hormones in response  
174 to fasting and feeding, which may contribute to observed potentiating effects. We measured concentrations  
175 of a range of hormones with known effects on bone homeostasis in young and old mice, in both ad-lib fed  
176 and fasted/fed groups. Since both young and aged mice previously exhibited a similar 2-hour hyperphagic  
177 response following fasting before returning to the same food intake, serum concentrations of ghrelin, leptin,  
178 pancreatic hormone insulin, and intestinal peptides GIP and GLP1 were measured at 3 time points  
179 (overnight 16-hour fasted at 12:00 noon on the day following the fast, then 2 hours and 3 hours after initiating  
180 food intake at 14:00 and 15:00 respectively) using a multiplex metabolic assay. Endocrine profiles differed  
181 between young and aged mice. Fasting and feeding changed circulating serum concentrations of ghrelin,  
182 leptin, insulin and GLP-1, but not GIP in young mice (Table 2). In older mice, absolute concentrations of  
183 hormones were different, but differences between ad-lib fed and fasted fed mice were not significant (Table  
184 3).  
185 Ghrelin concentrations fell significantly 2 hours after initiating food intake in young mice, but remained high  
186 in older animals (Fig. 5a, b). In fasted fed young and aged mice, serum leptin concentrations increased  
187 significantly at 14:00 and 15:00 compared with those at 12:00, whereas in ad-lib fed mice remained  
188 unchanged. Fasting serum concentration of leptin was significantly lower at 12:00 and significantly higher at  
189 15:00 in fasted fed young mice compared to those in ad-lib fed mice (Fig. 5c and d). In fasted fed young

190 mice serum insulin concentration significantly increased from 12:00 to 14:00 and in comparison to that in ad-  
191 lib fed mice, then significantly decreased at 15:00 (Fig. 5e). In fasted fed aged mice, serum insulin  
192 concentration increased but not significantly from 12:00 to 14:00, then significantly decreased at 15:00  
193 compared to that at 14:00, whereas serum insulin concentrations remained unchanged in ad-lib fed aged  
194 mice (Fig. 5f). In fasted fed young mice, serum GIP and GLP1 concentrations significantly increased at  
195 14:00 and 15:00 compared with those at 12:00 and remained unchanged in ad-lib fed mice (Fig. 5g, i).  
196 Serum GLP1 concentration was significantly higher at 15:00 in fasted fed mice compared to that in ad-lib fed  
197 mice (Fig. 5i). There were no significant changes in serum GIP and GLP1 concentrations within and  
198 between fed and fasted fed aged mice (Fig. 5h, j).

### 199 Discussion

200 These data provide compelling evidence for a link between variations in timing of feeding and adaptive  
201 responses of bone to loading. Age-related bone loss across multiple sites within the skeleton suggests that  
202 systemic regulation plays an essential role in bone homeostasis. Concentrations of a number of gastro-  
203 entero-pancreatic hormones change before, during and after feeding, which have direct or indirect effects on  
204 bone cells. We interpret the data from this study to provide proof-of-principle that the effects of anabolic  
205 hormones in increasing bone formation in response to mechanical loading may be manipulated by changing  
206 timing of feeding in relation to exercise imposition. It has been previously shown that parathyroid hormone  
207 (an osteotropic hormone) administration potentiates effects of loading(14–16), but this study is the first report  
208 of a non-pharmacological intervention with such effects. The ability of feeding interventions to amplify the  
209 effects of loading stimuli is compelling, but its ability to turn a sub-threshold stimulus (one which alone does  
210 not stimulate any adaptive bone responses) into one causes significant new bone formation has potentially  
211 pervasive implications.

212 Our study of the fasting/2-hour feeding before mechanical loading in older mice did not recapitulate results  
213 seen in younger animals. Measurement of hormones in our studies gives clues to possible explanations for  
214 differences in adaptive responses of bones between young and aged mice as in the data on 5 different  
215 hormones, we determined clear differences in changes over the fasting/feeding/loading period in the two age  
216 groups. Age-related impairment of the function of mechanostat and decline of the skeletal robustness may  
217 have also reduced sensitivity of the cortical bone to mechanical stimulation in aged male mice. Further, the  
218 altered cortical bone response to the strain-related stimulus in aged male mice compared to young ones may  
219 reflect the deficiencies in osteoblast recruitment, differentiation and function. However, one limitation of this  
220 study is that we did not examine different timings of fasting and feeding in old mice as we had in young mice.  
221 We were conscious that repeated blood sampling from mice could be stressful, and that such stress might  
222 affect levels of the hormones we wished to measure. However, assessments of serum cortisol  
223 concentrations during those blood sampling studies showed no significant changes suggesting minimal  
224 impact of the procedure on stresses experienced by the mice (Supplementary Fig. S2).

225 Currently, although the effects we demonstrate are potent and robust, we have only association between the  
226 changes in bone responses and the hormonal alterations before, during and after feeding. There are  
227 however, compelling data on the way that such hormonal changes occur, and it is appropriate to consider  
228 some of the possible candidates in this connection.

229 Leptin is well recognised as a bone anabolic hormone, with its own effects mediated by central and  
230 peripheral mechanisms as well as those through other central relays(20). We found like others before, that  
231 leptin concentrations are lower in fasted mice and that they increase following feeding(21–23). It is known  
232 that leptin increases bone formation(24, 25), although to our knowledge, there are no reports of concurrent  
233 administration of leptin and loading of bones.

234 Ghrelin is thought to be antagonistic to leptin, has direct effects on bone homeostasis both *in vivo* and *in*  
235 *vitro*(26, 27) and changes during fasting and in advance of feeding(28, 29). The high circulating ghrelin  
236 concentrations during fasting and then low concentrations after food intake would be consistent with an  
237 influence of the leptin/ghrelin axis on the loading related bone formation that we demonstrate.

238 Insulin increases bone formation and decreases bone resorption both *in vivo* and *in vitro*(30–32). During  
239 fasting circulating insulin concentrations are low (basal condition) and as eating commences, plasma insulin  
240 concentrations rise to regulate blood glucose concentrations. These elevated levels would be consistent with  
241 a potentiated anabolic bone response to loading. Specifically, we demonstrate that 2-hours of feeding after  
242 fasting increased serum insulin concentrations in young mice. The lack of similar change in insulin in the  
243 older mice is consistent with our demonstration that the same potentiation did not occur in them. As insulin  
244 has promiscuous effects on IGF receptors, which are expressed on osteoblasts(33), it is likely that any  
245 insulin-mediated effect is complex.

246 GIP is a bone anabolic *in vitro*(34, 35) and mice overexpressing GIP have increased bone mass(36).  
247 Similarly, GLP1 receptors are expressed on osteoblasts, bone marrow stromal cells(37) and on thyroid C  
248 cells(38), so GLP1 has the potential for direct and indirect actions on bone. However, as the concentrations  
249 of both hormones were unchanged in aged mice by our interventions we conclude that impairment of GIP or  
250 GLP1 signalling in bone cells are likely to be involved in attenuated bone response we observed. The roles  
251 of these different hormones could be clarified by interventional studies where hormones were administered



252 in order to mimic the fasting/feeding changes, or in knockout or over-expressing mice, but those studies are  
253 beyond the scope of this research and any single report.  
254 While fasting mice for 16 hours is a much more significant period of food deprivation than overnight fasting in  
255 humans, it is possible that similar biological interactions occur in humans, that could be exploited to benefit  
256 bone health. Future studies may allow us to determine whether such potentiating effects are observed in  
257 humans and what recommendations can be made to humans with respect to timing, amount and  
258 composition of food ingestion to obtain the maximal benefits from exercise. If we can identify interventions  
259 that potentiate bone's response to exercise in young humans, then such interventions would increase adult  
260 bone mass so that with ageing, the additional strength of bones would extend time before osteoporotic  
261 "fracture thresholds" were reached. If similar interventions were identified in older mice and then humans  
262 too, then they could be translatable into a non-pharmacological way to improve bone health of older people.  
263 There are already widespread fasting and caloric restriction interventions in use in humans for weight control  
264 and for healthy ageing(39). In particular, the 5:2 diet in which food intake is restricted to 500 – 600 calories  
265 on two days per week, which could be exploited to provide the equivalent of fast experienced by mice in this  
266 study. The likelihood that effects we show here could be translatable to humans has been increased by a  
267 recent study(40) that showed in postmenopausal women eating only twice daily, positive effects of treadmill  
268 exercise on serum biomarkers of bone formation, one hour after eating but not 1 hour before eating.

## 269 **Materials and methods**

### 270 ***Animals***

271 Male C57BL/6 wild type mice at 16 weeks of age (young adult) and 20 months of age (aged) were obtained  
272 from Charles River Laboratories Inc. (Margate, UK). The mice were caged separately and acclimatised to  
273 their surroundings for 7 days. All mice were allowed free access to water and a maintenance diet ad libitum  
274 (2018C Teklad Global 18% Protein Rodent Diet; Madison, WI, USA, Supplementary Table S1) in a 12-hour  
275 light/dark cycle at a room temperature of  $21 \pm 2^{\circ}\text{C}$  and relative humidity of  $55 \pm 10\%$ . Cages contained wood  
276 shavings, bedding and metal rings for mice to play. All procedures complied with the United Kingdom  
277 Animals (Scientific Procedures) Act 1986 (ASPA) and were reviewed and approved by the University of  
278 Sheffield Research Ethics Committee (Sheffield, UK). 3Rs principle followed as the ethical framework for  
279 conducting all the scientific experiments.

### 280 ***Assessment of feeding behaviour of fed or fasted young and aged mice***

281 Groups of young adult male mice at 17 weeks of age and aged male mice at 20 months of age were either  
282 allowed access to a maintenance diet ad libitum or fasted overnight for 16 hours and were assessed for  
283 subsequent feeding behaviour. The nesting material, bedding and wood shavings were removed from the  
284 cages prior to the experiment. All mice were allowed free access to water. Food intake was measured by  
285 monitoring the consumed food and body weights of animals every 30 minutes for the first 3 hours then every  
286 hour for another 4 hours twice weekly for one week. After the experiments mice were placed in new cages  
287 with wood shavings and bedding.

### 288 ***In vivo non-invasive axial mechanical loading of knee joints***

289 The right tibia of each mouse was subjected to non-invasive, dynamic axial mechanical loading under the  
290 isoflurane-induced anaesthesia (liquid isoflurane was vaporised to a concentration of 5% and maintained at  
291 a concentration of 3% with oxygen) for 7min/day, 3 alternate days a week for 2 weeks according to the  
292 protocols described in the previous studies(16, 18). The left tibiae were non-loaded internal controls. To  
293 apply mechanical loading, mice were anaesthetised, and the knee and ankle joints of the right limbs were  
294 fixed in customised concave cups. The knee was positioned into the upper cup, which was attached to the  
295 activator arm displacement transducer and the ankle in the lower cup attached to the dynamic load cell. The  
296 tibia was held in place by continuous static preload of 0.5N onto which dynamic loads were superimposed in  
297 a series of 40 trapezoidal shaped waveform cycles with steep up and down ramps with a high dwell time of  
298 0.25s and 9s low dwell 'rest interval' between each cycle. The load was applied to engender the required  
299 magnitude of strain on the bones of animals in each of the age groups(41). The engendered average strain  
300 rate was  $30000\mu\epsilon/\text{s}$ , which is shown to be equivalent to physiological strain rates(42).

### 301 ***Calcein administration***

302 150mg of calcein powder was added to 50ml  $\text{dH}_2\text{O}$ . Then 0.1g of  $\text{NaHCO}_3$  was added to neutralise the pH of  
303 the solution. The solution was protected from light with aluminium foil. After the solution was fully dissolved, it  
304 was filter-sterilized at  $0.22\mu\text{m}$  into autoclaved vials also protected from light with aluminium foil. The pH of  
305 the solution was measured with a bench pH-meter and corrected to neutral pH 7 with HCl or NaOH. The  
306 calcein solutions were made on the same days prior to the experiments ensuring no loss of fluorescence  
307 from the fluorochrome label. Calcein was administered at a concentration of 30mg/kg in 0.2%  $\text{NaHCO}_3$   
308 solution subcutaneously on the first and last days of mechanical loading (days 1 and 12) using insulin  
309 syringes(43).

### 310 **Micro-computed tomography ( $\mu$ CT) analysis**

311 The tibiae were collected after mice were culled, and loading responses of bones determined by  $\mu$ CT using a  
312 SkyScan 1172 (Bruker MicroCT, Kontich, Belgium). Since mouse bones are small, and axial loading related  
313 osteogenesis is site-specific, high-resolution  $\mu$ CT analysis was used primarily to quantify three-dimensional  
314 (3D) bone microarchitecture at comparable sites (proximal and mid-shaft regions) of loaded and contralateral  
315 non-loaded control tibiae. The tibiae were stored in 70% EOH and mounted in a plastic tube wrapped in cling  
316 film to prevent drying during scanning. The high-resolution scans were imaged with a pixel size of 4.3 $\mu$ m.  
317 The applied X-ray voltage was 50kV, X-ray intensity 200 $\mu$ A with a 0.5mm aluminium filtration. The scans  
318 were taken over 180 degrees with a 0.7-degree rotation step. The images were reconstructed and binarised  
319 with a threshold of 0 to 0.16, ring artefact reduction was set at 10 and beam hardening correction at 0%  
320 using the SkyScan NRecon software package (version 1.6.9.4, Bruker MicroCT, Kontich, Belgium). The  
321 images then were realigned vertically using DataViewer software (version 1.5.1.2 64-bit) before the 3D  
322 quantification.

### 323 **3-dimensional (3D) and colour coded analysis**

324 Structural parameters were calculated using SkyScan Ct.An software (Bruker MicroCT, Kontich, Belgium) for  
325 cortical bone 1-mm-long section at the mid-shaft of the tibia with an offset of 0.5mm, and for trabecular bone  
326 - secondary spongiosa, 1mm distal to the tibial proximal growth plate with an offset of 0.2mm ensuring the  
327 growth plate was not included in the analysis. In the trabecular region, an irregular, anatomic region of  
328 interest (ROI) adjacent to the endocortical boundary was analysed. Two ROIs were drawn to analyse the  
329 cortical region including 'doughnut' shaped ROI and 'crude' ROI around the outside of the bone.  
330 The bone mass, architecture and changes due to the mechanical loading were evaluated in cortical and  
331 trabecular bone regions according to the guidelines for the assessment of bone microstructure in rodents  
332 using  $\mu$ CT(44). 3D representations of the bones were created using the Voxler software (Golden Software  
333 Inc., 2006). The local bone thickness (Th; voxel) was determined and colour-coded thickness images were  
334 generated using the Avizo® (version 8.0, VSG, Burlington, VT, USA) software.

### 335 **Bone dynamic histomorphometry**

336 After  $\mu$ CT scanning and being fixed in 70% EOH for a minimum of 48hrs, the mouse bones were infiltrated in  
337 increasing concentrations of alcohol (80% IMS alcohol, 80% IMS alcohol, 100% IMS alcohol, 100% IMS  
338 alcohol, 100% EOH, 100% EOH and 100% EOH) on a shaker at room temperature for 48hrs at each  
339 concentration. Bones were then infiltrated in glass bottles with medium grade LR White resin at 4 $^{\circ}$ C for 6  
340 days, resin was changed every 48hrs. The sample bottles were agitated gently and continuously on a shaker  
341 for a duration of the infiltration at 4 $^{\circ}$ C. Next, the bones were placed longitudinally and diagonally in plastic  
342 moulds fully filled with fresh resin and covered with labelled plastic embedding stubs at room temperature.  
343 Resin was then allowed to polymerise at 55 $^{\circ}$ C overnight for up to 24hrs until it was hard. After  
344 polymerisation, blocks were removed from the moulds and protected from the light during the storage and  
345 subsequent use. The bones were protected from the light at all stages of the processing to prevent the loss  
346 of fluorescence from the labels.

### 347 **Sectioning and visualisation**

348 The bones were reoriented vertically, then 8 $\mu$ m thick transverse sections were obtained from the cortical ROI  
349 corresponding to the mid-shaft of the tibiae and as determined by  $\mu$ CT, using the tungsten carbide-tipped  
350 16cm microtome knife on the rotary microtome. Sections were unrolled and floated onto a drop of the dH<sub>2</sub>O  
351 on a labelled Superfrost Plus glass slides using fine paintbrush and forceps. The slides were covered with  
352 Saran wrap and wrapped with blotting paper making sure the Saran wrap-covered sections were flat without  
353 creases or residual water. The slides then were dried at 50 $^{\circ}$ C overnight stacked in the slide clump to aid  
354 adherence of bones sections. After peeling off the Saran wraps slides were mounted in the xylene for 2-3min  
355 and then covered with glass coverslip using DPX mountant. Images of calcein labelled transverse bone  
356 sections were visualised using Leica fluorescent microscope at 4x and 10x magnifications. All slides were  
357 stored protected from the light until time for histomorphometry analysis.

### 358 **Measurements of bone formation parameters**

359 The histological assessment of bone phenotypes was carried out by dynamic histomorphometry measuring  
360 its derived kinetic indices(45). A Leica microscope was set up for fluorescence before placing the slides with  
361 calcein labeled sections under the microscope. To reach its full output, the fluorescent lump was allowed to  
362 warm up for 5min before measurements were made. Bone formation parameters including mineralizing  
363 surface (MS), mineral apposition rate (MAR) and bone formation rate (BFR) were measured using the  
364 OsteoMeasure software (version 3.3.0.2).

### 365 **Blood collection**

366 Small blood volumes were obtained from the mice by tail vein sampling technique with assistance from the  
367 Biological Services Unit at the Royal Hallamshire Hospital of The University of Sheffield. To avoid  
368 hyperthermia and dehydration and reduce stress levels, this technique was performed without warming mice  
369 in the warming cabinet prior to taking the blood samples. Mice were gently placed in the restraint tube and

370 lateral tail veins were accessed by making incisions in approximately one-third from the proximal end along  
371 the length of the tails(46). Repeated blood micro samples (typically  $\leq 50\mu\text{l}$ ) were collected from the lateral  
372 mouse-tail veins 3 times in any one 24-hour period.

### 373 **Mouse multiplex metabolic hormone assay**

374 Serum ghrelin, leptin, insulin, GIP and GLP1 concentrations were assayed in mouse sera using mouse  
375 multiplex assay (Bio-Rad, Watford, UK) following manufacturer's instructions. The mouse assay is magnetic  
376 bead-based multiplex assay that allows measurement of multiple proteins in small volumes of sera. Briefly, a  
377 96-well plate was pre-coated with  $50\mu\text{l}$  of beads coupled with the capture antibodies. After washing twice  
378 with wash buffer,  $50\mu\text{l}$  of standards, blank and serum samples were added into the wells, incubated at room  
379 temperature with shaking for 1hr, washed and followed by addition of the detection antibodies and  
380 streptavidin-phycoerythrin (SA-PE) conjugates. Following incubation at room temperature with shaking, the  
381 plate was washed three times with wash buffer and beads were resuspended in  $125\mu\text{l}$  assay buffer with  
382 shaking at 850rpm for 30s. The plate was then read on Bio-Plex system using Bio-Plex Manager software (v  
383 6.0). Samples (pg/ml) were assessed in duplicate.

### 384 **Serum cortisol analysis**

385 Cortisol concentrations were measured in mouse sera by a solid phase competitive enzyme linked  
386 immunosorbent assay (ELISA) (Sigma-Aldrich Co Ltd, USA) according to the manufacturer's protocol. Prior  
387 to the assay the frozen sera were thawed at a room temperature and mixed well using vortexer. Briefly,  $25\mu\text{l}$   
388 of mouse serum was added into each microwell of the plate, coated with the anti-cortisol MAb, along with the  
389 standards for 6-point standard curve (1-80ng/ml), blank and internal control. After incubation at room  
390 temperature with shaking for 60min, wells were washed three times with wash buffer and treated with  
391 3,3',5,5' - Tetramethylbenzidine (TMB) substrate for 15min. The colorimetric reaction was then stopped and  
392 absorbance was measured at 450nm on ELISA reader. A 4-parametre logistic regression was applied to the  
393 standard curve for the calculation of cortisol concentrations in the samples (ng/ml). Samples were assessed  
394 in duplicate.

### 395 **Statistical analysis**

396 All analyses were performed using GraphPad Prism software 6.0f version (GraphPad Inc, La Jolla, CA,  
397 USA). The results were presented as the mean  $\pm$  standard error (SEM). The Normal distribution of data was  
398 assessed using the Shapiro-Wilk normality test. Statistical significance was tested using parametric  
399 statistical tests. For comparing two groups, two-tail Student's *t*-test (paired or unpaired) was used. For  
400 comparing more than two groups, two-way ANOVA (analysis of variance) was used with Tukey post-hoc test  
401 to assess the effect of loading, fasting/feeding and interactions within and across the experimental groups.  
402 The significance was set at  $p < 0.05$ .

### 403 **Acknowledgements and funding sources**

404 This study was supported by CIMA (The MRC – Versus Arthritis Centre for Integrated Research into  
405 Musculoskeletal Ageing) (to TMS and JCM; MR/K006312/1) performed as a collaborative project between  
406 the Universities of Sheffield, Newcastle and Liverpool. The authors thank the members of the Skeletal  
407 laboratory, The University of Sheffield, for tissue processing, Dr Carmen Martin-Ruiz (NIHR Newcastle  
408 Biomedical Research Centre, Ageing Research laboratories) for the analysis of serum cortisol  
409 concentrations in young adult and aged mice.

### 410 **References**

- 411 1. W. He, D. Goodkind, P. Kowal, An Aging World: 2015 International Population Reports. *Aging*  
412 (*Albany, NY*), 165 (2016).
- 413 2. E. H. Schemitsch, *et al.*, Loss of Independence After Operative Management of Femoral Neck  
414 Fractures. *J. Orthop. Trauma* **33**, 292–300 (2019).
- 415 3. J. Wolff, Ueber die innere Architectur der Knochen und ihre Bedeutung für die Frage vom  
416 Knochenwachsthum. *Arch. Für Pathol. Anat. Physiol. Für Klin. Med* **50**, 389–450 (1870).
- 417 4. H. M. Frost, On the strength-safety factor (SSF) for load-bearing skeletal organs. *J. Musculoskelet.*  
418 *Neuronal Interact.* **3**, 136–140 (2003).
- 419 5. S. L. Bonnet, Nicolas and Ferrari, Exercise and the Skeleton: How It Works and What It Really Does.  
420 *IBMS Bonekey* **7**, 235–248 (2010).
- 421 6. N. N. Konda, *et al.*, A comparison of exercise interventions from bed rest studies for the prevention of  
422 musculoskeletal loss. *npj Microgravity* **5** (2019).
- 423 7. P. Gonzalo-Encabo, J. McNeil, D. J. Boyne, K. S. Courneya, C. M. Friedenreich, Dose-response  
424 effects of exercise on bone mineral density and content in post-menopausal women. *Scand. J. Med.*  
425 *Sci. Sport.* **29**, 1121–1129 (2019).
- 426 8. L. G. Raisz, E. Seeman, Causes of age-related bone loss and bone fragility: An alternative view. *J.*  
427 *Bone Miner. Res.* **16**, 1948–1952 (2001).
- 428 9. S. Perrini, *et al.*, The GH/IGF1 axis and signaling pathways in the muscle and bone: Mechanisms  
429 underlying age-related skeletal muscle wasting and osteoporosis. *J. Endocrinol.* **205**, 201–210



- 430 (2010).
- 431 10. P. D'Amour, Acute and chronic regulation of circulating PTH: Significance in health and in disease.
- 432 *Clin. Biochem.* **45**, 964–969 (2012).
- 433 11. K. E. Govoni, Insulin-like growth factor-I molecular pathways in osteoblasts: potential targets for
- 434 pharmacological manipulation. *Curr. Mol. Pharmacol.* **5(2)**, 143–152 (2012).
- 435 12. F. J. A. De Paula, C. J. Rosen, Bone Remodeling and Energy Metabolism: New Perspectives. *Bone*
- 436 *Res.* **1**, 72–84 (2013).
- 437 13. Y. Ma, *et al.*, Parathyroid hormone and mechanical usage have a synergistic effect in rat tibial
- 438 diaphyseal cortical bone. *J. Bone Miner. Res.* **14**, 439–448 (1999).
- 439 14. C. H. Kim, *et al.*, Trabecular Bone Response to Mechanical and Parathyroid Hormone Stimulation:
- 440 The Role of Mechanical Microenvironment. *J. Bone Miner. Res.* **18**, 2116–2125 (2003).
- 441 15. J. Li, R. L. Duncan, D. B. Burr, V. H. Gattone, C. H. Turner, Parathyroid hormone enhances
- 442 mechanically induced bone formation, possibly involving L-type voltage-sensitive calcium channels.
- 443 *Endocrinology* **144**, 1226–1233 (2003).
- 444 16. T. Sugiyama, *et al.*, Mechanical loading enhances the anabolic effects of intermittent parathyroid
- 445 hormone (1-34) on trabecular and cortical bone in mice. *Bone* **43**, 238–248 (2008).
- 446 17. A. Shibamoto, *et al.*, Effect of high-frequency loading and parathyroid hormone administration on
- 447 peri-implant bone healing and osseointegration. *Int. J. Oral Sci.* **10**, 1–7 (2018).
- 448 18. R. L. De Souza, *et al.*, Non-invasive axial loading of mouse tibiae increases cortical bone formation
- 449 and modifies trabecular organization: A new model to study cortical and cancellous compartments in
- 450 a single loaded element. *Bone* **37**, 810–818 (2005).
- 451 19. T. Sugiyama, *et al.*, Bones' adaptive response to mechanical loading is essentially linear between the
- 452 low strains associated with disuse and the high strains associated with the lamellar/woven bone
- 453 transition. *J. Bone Miner. Res.* **27**, 1784–1793 (2012).
- 454 20. J. Upadhyay, O. M. Farr, C. S. Mantzoros, The role of leptin in regulating bone metabolism.
- 455 *Metabolism.* **64**, 105–113 (2015).
- 456 21. J. S. Ahima, Rexford S., Prabakaran, Daniel, Mantzoros, Christos, Qu, Daqing, Lowell, Bradford,
- 457 Maratos-Flier, Eleftheria, Flier, Role of leptin in the neuroendocrine response to fasting. *Nature* **382**,
- 458 250–252 (1996).
- 459 22. B. Ahrén, S. Månsson, R. L. Gingerich, P. J. Havel, Regulation of plasma leptin in mice: Influence of
- 460 age, high-fat diet, and fasting. *Am. J. Physiol. - Regul. Integr. Comp. Physiol.* **273** (1997).
- 461 23. P. Trayhurn, N. Hoggard, J. G. Mercer, D. V. Rayner, Hormonal and neuroendocrine regulation of
- 462 energy balance - The role of leptin. *Arch. Anim. Nutr.* **51**, 177–185 (1998).
- 463 24. T. Thomas, *et al.*, Leptin acts on human marrow stromal cells to enhance differentiation to
- 464 osteoblasts and to inhibit differentiation to adipocytes. *Endocrinology* **140**, 1630–1638 (1999).
- 465 25. M. W. Hamrick, S. L. Ferrari, Leptin and the sympathetic connection of fat to bone. *Osteoporos. Int.*
- 466 **19**, 905–912 (2008).
- 467 26. N. Fukushima, *et al.*, Ghrelin directly regulates bone formation. *J. Bone Miner. Res.* **20**, 790–798
- 468 (2005).
- 469 27. M. Van Der Velde, *et al.*, An age-dependent interaction with leptin unmasks Ghrelin's bone-protective
- 470 effects. *Endocrinology* **153**, 3593–3602 (2012).
- 471 28. A. Asakawa, *et al.*, Ghrelin is an appetite-stimulatory signal from stomach with structural resemblance
- 472 to motilin. *Gastroenterology* **120**, 337–345 (2001).
- 473 29. M. Kojima, K. Kangawa, Ghrelin: Structure and function. *Physiol. Rev.* **85**, 495–522 (2005).
- 474 30. D. M. Thomas, *et al.*, Insulin receptor expression in primary and cultured osteoclast-like cells. *Bone*
- 475 **23**, 181–186 (1998).
- 476 31. J. Cornish, K. E. Callon, I. R. Reid, Insulin increases histomorphometric indices of bone formation in
- 477 vivo. *Calcif. Tissue Int.* **59**, 492–495 (1996).
- 478 32. K. K. Pun, P. Lau, P. W. M. Ho, The characterization, regulation, and function of insulin receptors on
- 479 osteoblast-like clonal osteosarcoma cell line. *J. Bone Miner. Res.* **4**, 853–862 (1989).
- 480 33. K. Fulzele, *et al.*, Disruption of the insulin-like growth factor type 1 receptor in osteoblasts enhances
- 481 insulin signaling and action. *J. Biol. Chem.* **282**, 25649–25658 (2007).
- 482 34. R. J. Bollag, *et al.*, Osteoblast-derived cells express functional glucose-dependent insulinotropic
- 483 peptide receptors. *Endocrinology* **141**, 1228–1235 (2000).
- 484 35. Q. Zhong, *et al.*, Effects of glucose-dependent insulinotropic peptide on osteoclast function. *Am. J.*
- 485 *Physiol. - Endocrinol. Metab.* **292**, 543–548 (2007).
- 486 36. D. Xie, *et al.*, Glucose-dependent insulinotropic peptide-overexpressing transgenic mice have
- 487 increased bone mass. *Bone* **40**, 1352–1360 (2007).
- 488 37. C. Sanz, *et al.*, Signaling and biological effects of glucagon-like peptide 1 on the differentiation of
- 489 mesenchymal stem cells from human bone marrow. *Am. J. Physiol. - Endocrinol. Metab.* **298**, 634–
- 490 643 (2010).
- 491 38. C. Yamada, *et al.*, The murine glucagon-like peptide-1 receptor is essential for control of bone
- 492 resorption. *Endocrinology* **149**, 574–579 (2008).

- 493 39. L. M. Redman, *et al.*, Metabolic Slowing and Reduced Oxidative Damage with Sustained Caloric  
494 Restriction Support the Rate of Living and Oxidative Damage Theories of Aging. *Cell Metab.* **27**, 805-  
495 815.e4 (2018).
- 496 40. K. T. Borer, Q. Zheng, A. Jafari, S. Javadi, T. Kernozek, Nutrient intake prior to exercise is necessary  
497 for increased osteogenic marker response in diabetic postmenopausal women. *Nutrients* **11** (2019).
- 498 41. L. B. Meakin, G. L. Galea, T. Sugiyama, L. E. Lanyon, J. S. Price, Age-related impairment of bones'  
499 adaptive response to loading in mice is associated with sex-related deficiencies in osteoblasts but no  
500 change in osteocytes. *J. Bone Miner. Res.* **29**, 1859–1871 (2014).
- 501 42. S. P. Fritton, C. T. Rubin, In vivo measurement of bone deformations using strain gauges. *Bone*  
502 *Mech. Handbook, Second Ed.*, 8-1-8–42 (2001).
- 503 43. R. A. Hillam, T. M. Skerry, Inhibition of bone resorption and stimulation of formation by mechanical  
504 loading of the modeling rat ulna in vivo. *J. Bone Miner. Res.* **10**, 683–689 (1995).
- 505 44. M. L. Bouxsein, *et al.*, Guidelines for assessment of bone microstructure in rodents using micro-  
506 computed tomography. *J. Bone Miner. Res.* **25**, 1468–1486 (2010).
- 507 45. D. W. Dempster, *et al.*, Standardized nomenclature, symbols, and units for bone histomorphometry: A  
508 2012 update of the report of the ASBMR Histomorphometry Nomenclature Committee. *J. Bone Miner.*  
509 *Res.* **28**, 2–17 (2013).
- 510 46. A. M. Sadler, S. J. Bailey, Validation of a refined technique for taking repeated blood samples from  
511 juvenile and adult mice. *Lab. Anim.* **47**, 316–319 (2013).

512

### Figure legends

#### 513 **Fig. 1 Feeding behaviour of young and aged male C57BL/6 mice**

514 **a** In total 14 mice were randomly divided into two groups; control ad-lib fed ( $n = 7$ ) or overnight 16-hour  
515 fasted ( $n = 7$ ) at 17 weeks of age. **b** In total 16 male mice were randomly divided into two groups; ad-lib fed  
516 ( $n = 8$ ) or 16-hour fasted ( $n = 8$ ) at 20 months of age. The body weights of mice were measured for 7 hrs  
517 following overnight fast to monitor food intake of the animals. Following overnight food restriction, fasted  
518 mice consumed more food compared with the mice in the control group that had free access to food ad  
519 libitum. The body weights of both young adult and aged mice in the fasted group increased significantly for 2  
520 hrs compared with their pre-fasted body weights indicating rapid ingestion of food (and water) in the early re-  
521 feeding period. The proportions of the starting pre-fasted body weights (%)  $\pm$  SEM are shown. \* indicates  
522 significant differences between fed and fasted fed groups; \*  $p < 0.05$ , \*\*  $p < 0.01$ , \*\*\*\*  $p < 0.0001$  by two-way  
523 ANOVA with Tukey post-hoc test

#### 524 **Fig. 2 Cortical bone phenotype of control (non-loaded) and loaded tibiae with 2200 microstrain** 525 **(maximal) loading regimen in 19-week-old fed or overnight fasted 2-hour fed male C57BL/6 mice**

526 **a** Three-dimensional images of a 1.0-mm-thick cortical bone region 0.9mm below the growth plate from the  
527 mid-shaft of control non-loaded (left) and loaded (right) tibiae of fed or fasted 2-hour fed mice. **b** Transverse  
528 cortical bone confocal microscope images from the mid-shaft of left non-loaded and right loaded tibiae of fed  
529 (top) or fed for 2 hours following overnight fast (bottom) male mice. Double calcein labels can be visualised  
530 on endocortical and periosteal surfaces of the loaded tibiae confirming new bone formation at these sites. **c**  
531 The change in cortical bone thickness (Ct.Th) of tibiae loaded at 13N to induce peak strain magnitude of  
532 2200 microstrain compared with non-loaded controls of fed or fasted 2-hour fed young adult male mice  
533 measured using  $\mu$ CT at tibial mid-shaft. Fasted 2-hour fed mice had significantly greater response in Ct.Th of  
534 the right tibiae compared with ad-libitum fed mice. Scale bar = 200 $\mu$ m. **d** Three-dimensional visualisation and  
535 representative colour-coded images of the cortical bone thickness of non-loaded and loaded tibiae of fed and  
536 fasted 2-hour fed young adult mice.  
537 All data are means  $\pm$  SEM.  $n = 7$  fed mice,  $n = 6$  fasted 2-hour fed mice. **c** Two-tailed Student's  $t$ -test; \*  $p <$   
538 0.05

#### 539 **Fig. 3 Cortical bone phenotype of control (non-loaded) and loaded tibiae with 1100 microstrain (sub-** 540 **threshold) and 1300 microstrain (submaximal) loading regimens in 19-week-old fed or overnight** 541 **fasted 2-hour fed male C57BL/6 mice**

542 **a** The effect of sub-threshold and **b** submaximal mechanical loadings with peak force of 8N to induce peak  
543 strain magnitude of 1100 microstrain and 11N to induce peak strain magnitude of 1300 microstrain  
544 respectively on Ct.Th of fed or fasted 2-hour fed young adult mice. All data are means  $\pm$  SEM,  $n = 7$ . **a, b**  
545 Two-way ANOVA with post-hoc Tukey comparisons; \*  $p < 0.05$ , \*\*  $p < 0.01$

#### 546 **Fig. 4 Cortical and trabecular bone phenotypes of control (non-loaded) and loaded tibiae with 2200** 547 **microstrain osteogenic loading regimen in 20-month-old fed or overnight fasted 2-hour fed male** 548 **C57BL/6 mice**

549 **a** Three-dimensional images of a 1.0-mm-thick cortical bone region 0.9mm below the growth plate from the  
550 mid-shaft of control non-loaded (left) and loaded (right) tibiae of fed or fasted 2-hour fed aged mice; scale bar

551 = 200µm. **b** The change in cortical bone thickness (Ct.Th) of tibiae loaded at 10N to induce peak strain  
 552 magnitude of 2200 microstrain compared with non-loaded controls of fed or fasted 2-hour fed aged male  
 553 mice measured using µCT at tibial mid-shaft. There was no significant difference in Ct.Th of the loaded tibiae  
 554 of fasted 2-hour fed mice compared with ad-libitum fed mice. **c** Three-dimensional visualisation and  
 555 representative colour-coded images of the cortical bone thickness of non-loaded and loaded tibiae of fed and  
 556 fasted 2-hour fed aged adult mice. **d** Trabecular bone pattern factor (Tb.Pf) of the right tibiae loaded at 10N  
 557 to induce peak strain magnitude of 2200 microstrain compared with non-loaded left controls of fed or fasted  
 558 2-hour fed aged male mice measured at tibial proximal region using µCT. Box-plots represent means ± SEM.  
 559  $n = 8$ . **b** Two-tailed Student's *t*-test **d** Two-way ANOVA with post-hoc Tukey comparisons; \*\*  $p < 0.01$ , \*\*\*  $p <$   
 560  $0.001$

561 **Fig. 5 Serum concentrations of ghrelin, leptin, insulin, GIP and GLP1 in young adult 17-week-old and**  
 562 **aged 20-month-old fed or overnight fasted 2-hour fed male C57BL/6 mice**

563 **a** Serum ghrelin concentration significantly increased from 12:00 to 14:00 in young fed mice and declined at  
 564 14:00 in young fasted fed mice compared with that in fed mice. **b** Serum ghrelin concentrations were  
 565 significantly higher at 14:00 and 15:00 compared to those at 12:00 in aged fed but not fasted fed mice. **c, d**  
 566 In young and aged fasted fed mice, serum leptin concentrations significantly increased at 14:00 and 15:00  
 567 compared with fasting serum concentration at 12:00 and remained relatively unchanged in ad-lib fed mice.  
 568 Concentrations of serum leptin was significantly lower at 12:00 and significantly higher at 15:00 in young  
 569 fasted fed mice compared to those in ad-lib fed mice (c). **e** Serum insulin concentrations significantly  
 570 increased from 12:00 to 14:00 in young fasted fed mice and in comparison to that in ad-lib fed mice, then  
 571 significantly decreased at 15:00. **f** In aged fasted fed mice, serum insulin concentrations increased but not  
 572 significantly from 12:00 to 14:00, then decreased significantly at 15:00 compared with that at 14:00 and  
 573 remained unchanged in fed mice. **g, i** In young fasted fed mice, serum GIP and GLP1 concentrations  
 574 significantly increased at 14:00 and 15:00 compared with fasting concentrations at 12:00 and remained  
 575 unchanged in fed mice. Serum GLP1 concentrations were significantly higher at 15:00 in fasted fed mice  
 576 compared to that in ad-lib fed mice (i). **h, j** There were no significant changes in serum GIP and GLP1  
 577 concentrations within and between aged fed and fasted fed mice. All data are means ± SEM.  $n = 6$  ad-libitum  
 578 fed mice,  $n = 7$  overnight (16-hour) fasted 2-hour fed mice. Two-way ANOVA with post-hoc Tukey  
 579 comparisons; \*  $p < 0.05$ , \*\*  $p < 0.01$ , \*\*\*  $p < 0.001$ , \*\*\*\*  $p < 0.0001$

580 **Tables**

581 **Table 1 Effect of 2-hour feeding following overnight fast on load-induced cortical bone formation in**  
 582 **young adult mice**  
 583

|                                                   | Fed         |             |                | Fasted Fed<br>2hrs |             |                |
|---------------------------------------------------|-------------|-------------|----------------|--------------------|-------------|----------------|
|                                                   | Loaded      | Non-loaded  | <i>p</i> value | Loaded             | Non-loaded  | <i>p</i> value |
| MS (%)                                            | 1.03 ± 0.02 | 0.55 ± 0.06 | < 0.01         | 1.35 ± 0.15        | 0.6 ± 0.05  | < 0.0001       |
| MAR (µm/day)                                      | 2.0 ± 0.13  | 0.33 ± 0.15 | < 0.05         | 4.9 ± 0.8          | 0.07 ± 0.06 | < 0.0001       |
| BFR/BS<br>(µm <sup>3</sup> /µm <sup>2</sup> /day) | 1.04 ± 0.07 | 0.12 ± 0.06 |                | 3.57 ± 0.8         | 0.02 ± 0.01 | < 0.0001       |

584 MS = mineralising surface; MAR = mineral apposition rate; BFR/BS = bone formation rate. Values are mean  
 585 ± SEM.

586 **Table 2 Serum concentrations of hormones altered during fasting and feeding in young mice**

| Hormone | Fed       |            |            | <i>p</i> value      |
|---------|-----------|------------|------------|---------------------|
|         | 12:00     | 14:00      | 15:00      |                     |
| Ghrelin | 703 ± 162 | 1493 ± 156 | 1326 ± 119 | < 0.05 <sup>a</sup> |
| Leptin  | 298 ± 0.1 | 269 ± 25   | 276 ± 25   |                     |
| Insulin | 929 ± 94  | 1023 ± 133 | 1291 ± 110 |                     |
| GIP     | 54 ± 3    | 50 ± 3     | 51 ± 2     |                     |
| GLP1    | 8 ± 1     | 7 ± 1      | 7 ± 1      |                     |

Fasted Fed

|         |                    |                       |                     |                       |
|---------|--------------------|-----------------------|---------------------|-----------------------|
| Ghrelin | 1233±251           | 757±95 <sup>1</sup>   | 1143±48             |                       |
| Leptin  | 95±15 <sup>1</sup> | 437±62                | 601±76 <sup>3</sup> | < 0.0001 <sup>b</sup> |
| Insulin | 552±0.1            | 2175±303 <sup>2</sup> | 1319±107            | < 0.05 <sup>c</sup>   |
| GIP     | 44±2               | 58±2                  | 56±3                | 0.01 <sup>b</sup>     |
| GLP1    | 7±1                | 10±1                  | 11±1. <sup>1</sup>  | 0.05 <sup>b</sup>     |

587 Two-way ANOVA used to assess the differences within and between the groups. Comparisons of time points  
 588 within the same group are indicated as <sup>a</sup>12:00 < 14:00; <sup>b</sup>12:00 < 14:00,15:00; <sup>c</sup>12:00 < 14:00 > 15:00.  
 589 Comparisons of same time points between the groups are indicated as <sup>1</sup>*p* < 0.05; <sup>2</sup>*p* < 0.01; <sup>3</sup>*p* < 0.001.  
 590 Samples were assessed in duplicate. Results are expressed as pg/ml, mean ± SEM.

591 **Table 3 Serum concentrations of hormones altered during fasting and feeding in aged mice**

| Hormone | Fed               |          |          | p value             |
|---------|-------------------|----------|----------|---------------------|
|         | 12:00             | 14:00    | 15:00    |                     |
| Ghrelin | 803±129           | 2272±359 | 2330±209 | 0.01 <sup>a</sup>   |
| Leptin  | 686±123           | 681±115  | 528±84   |                     |
| Insulin | 1000±99           | 914±87.1 | 1123±131 |                     |
| GIP     | 46±2              | 43.1±1   | 45±2     |                     |
| GLP1    | 6±1               | 7±1      | 6±1      |                     |
|         | <b>Fasted Fed</b> |          |          |                     |
| Ghrelin | 944±256           | 1862±277 | 1934±327 |                     |
| Leptin  | 292±32            | 832±135  | 935±186  | < 0.05 <sup>a</sup> |
| Insulin | 570±0.1           | 1458±208 | 800±57   | < 0.05 <sup>b</sup> |
| GIP     | 35±3              | 63±12    | 48±16    |                     |
| GLP1    | 4±1               | 6±1      | 5±1      |                     |

592 Two-way ANOVA used to assess the differences within and between the groups. Comparisons of time points  
 593 within the same group are indicated as <sup>a</sup>12:00 < 14:00,15:00; <sup>b</sup>14:00 > 15:00. Samples were assessed in  
 594 duplicate. Results are expressed as pg/ml, mean ± SEM.



a

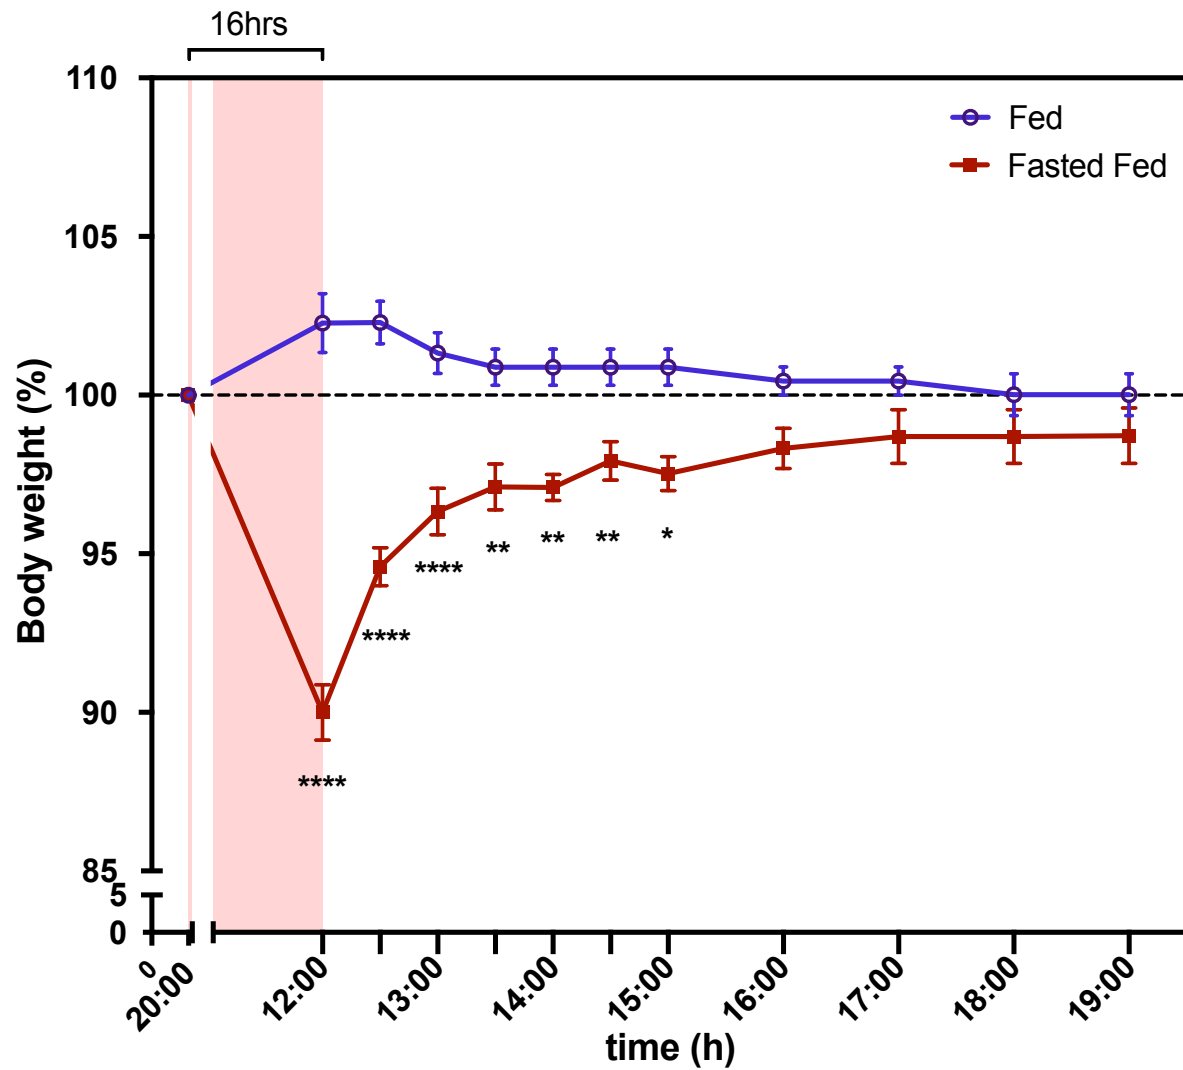

b

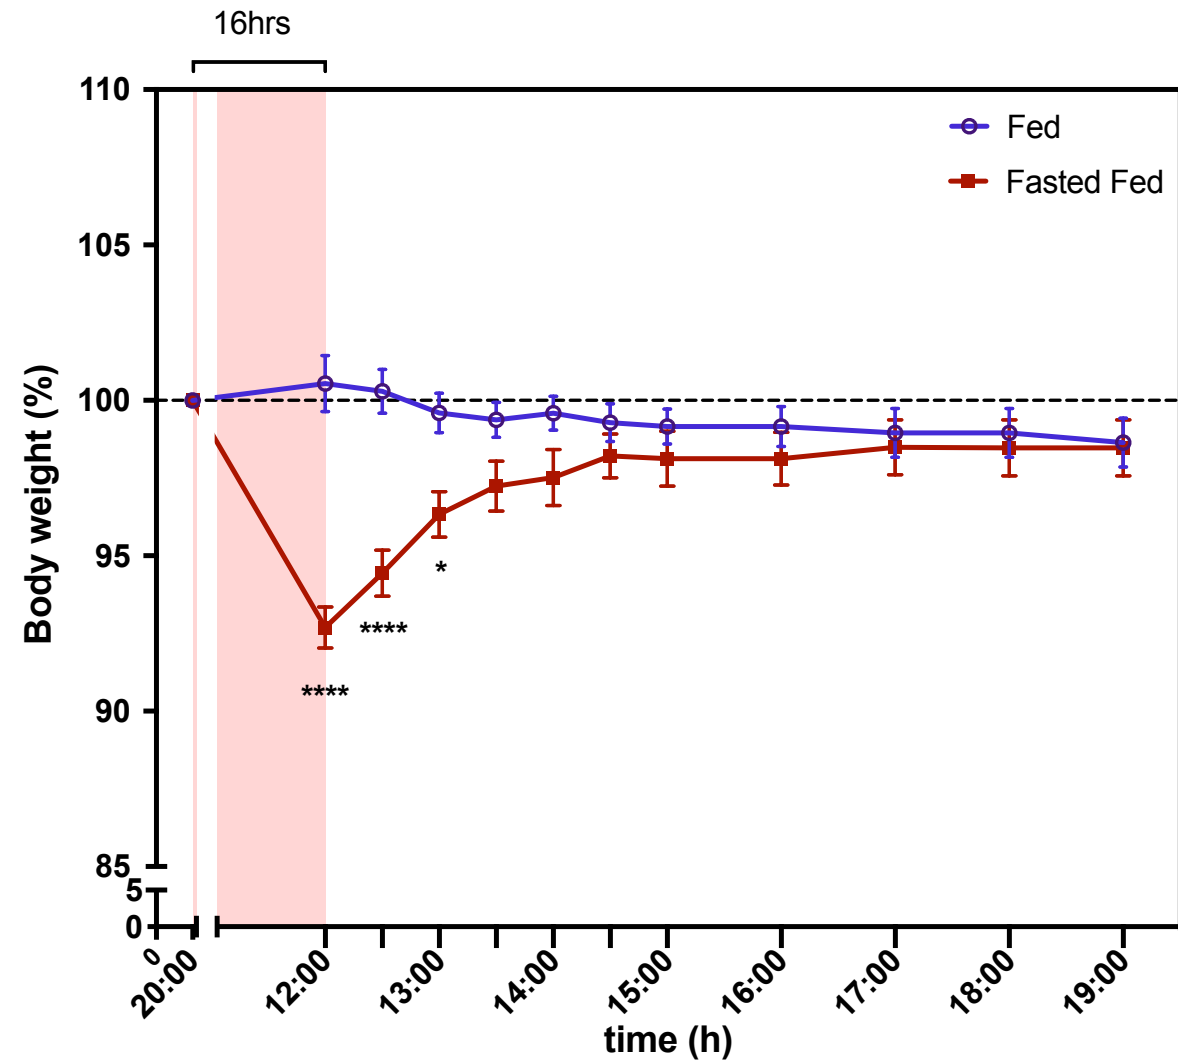

**a**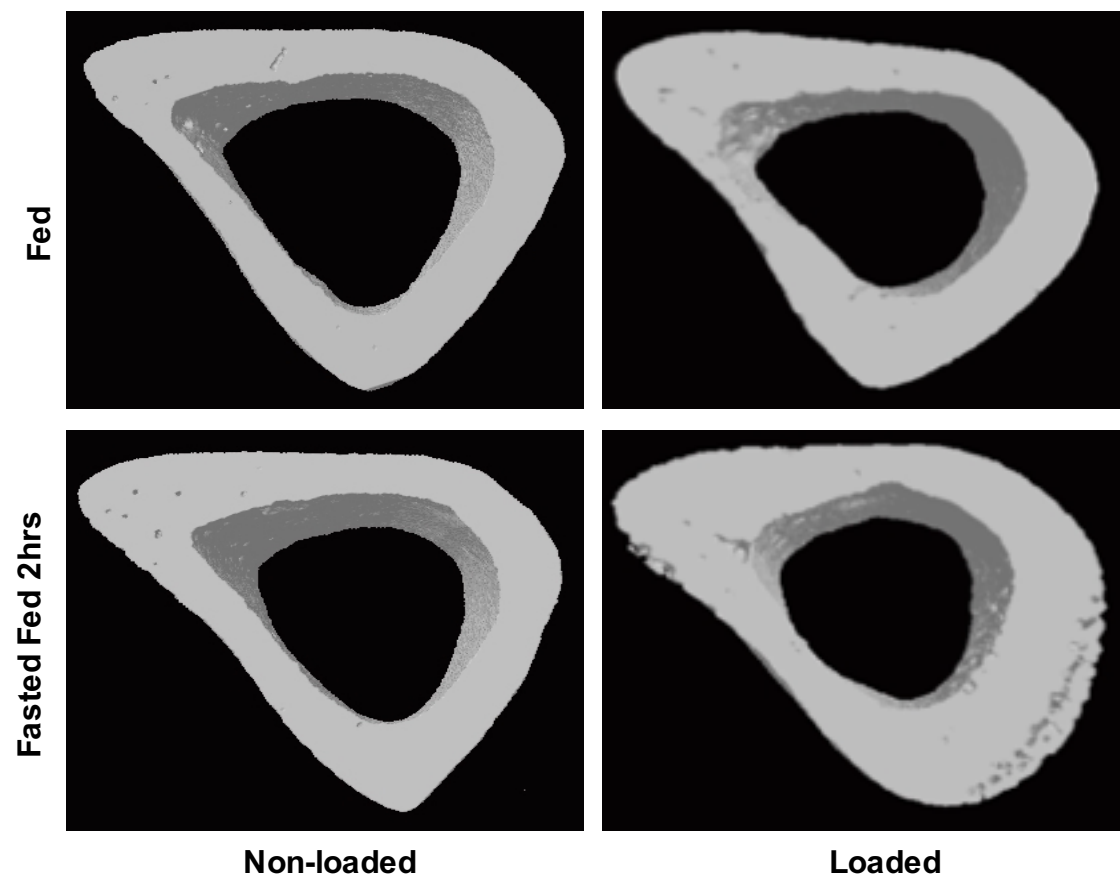**b**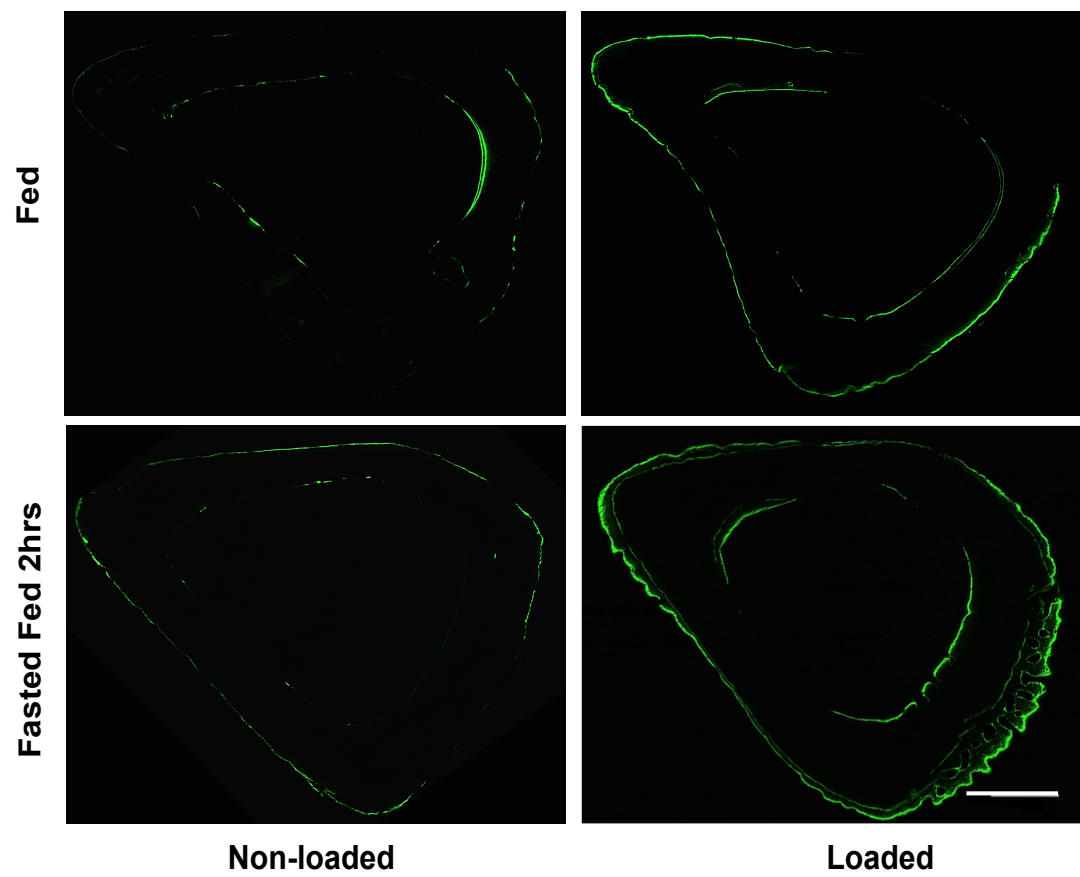**c**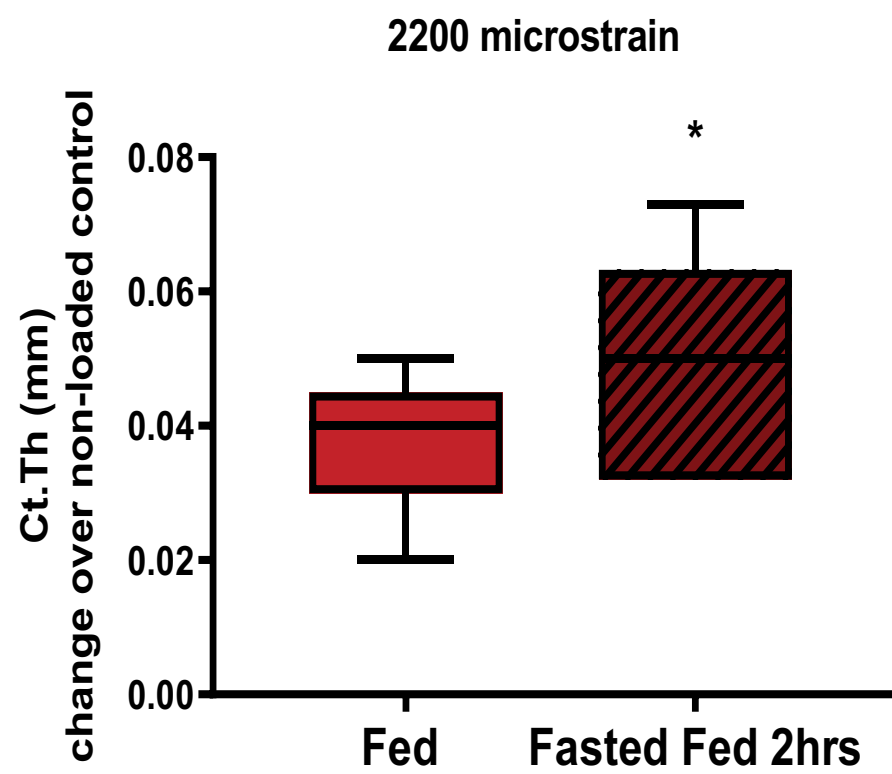**d**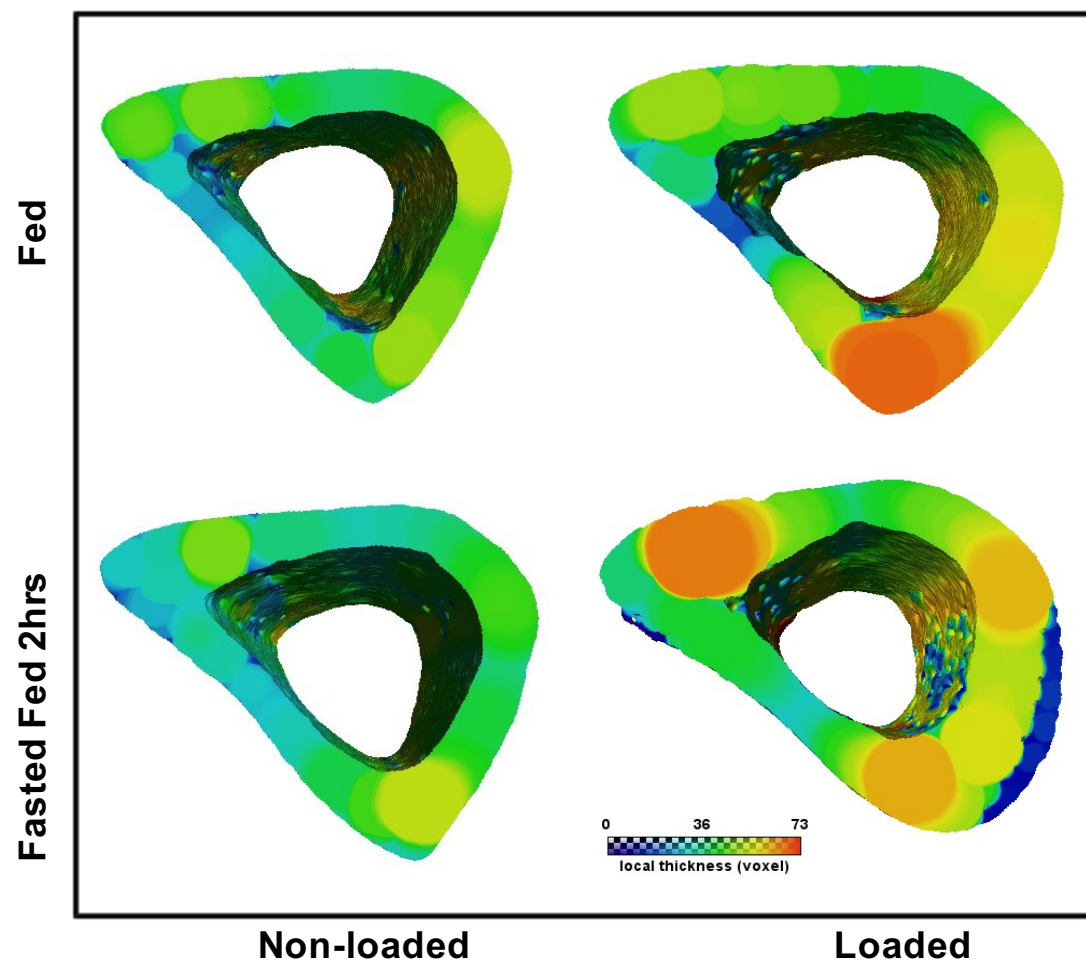

**a**

Left Control  
Right Loaded

**1100 microstrain**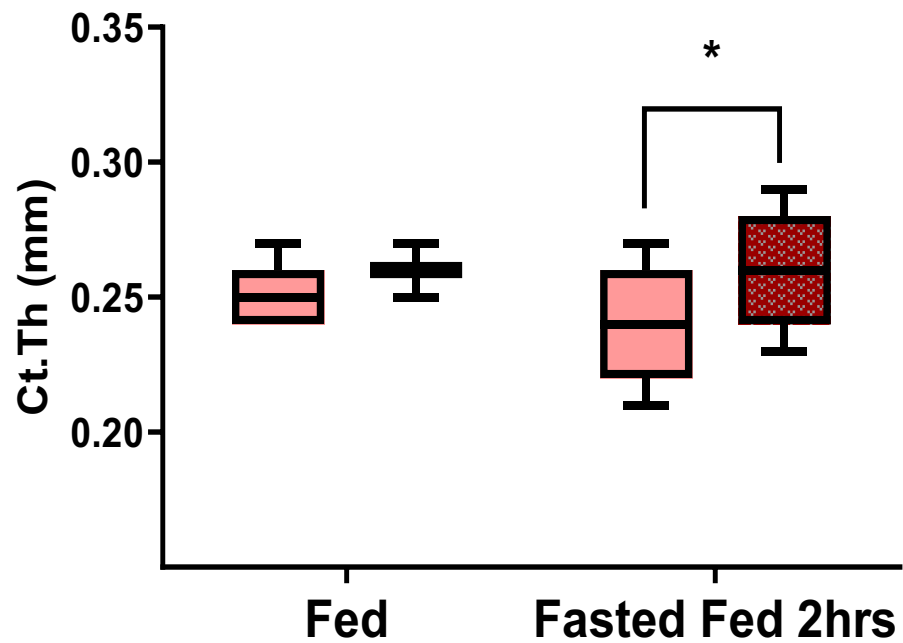**b****1300 microstrain**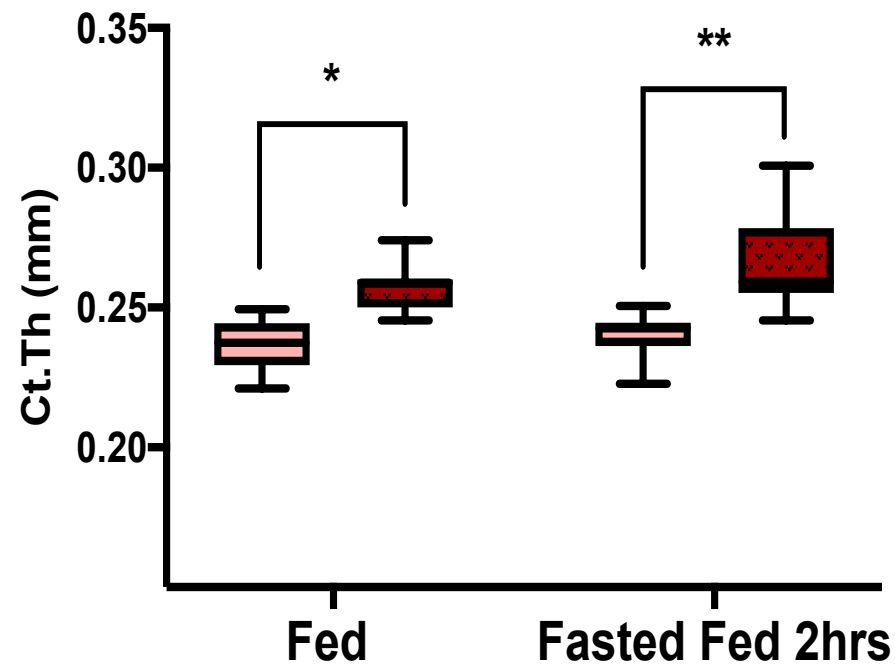

**a**

bioRxiv preprint doi: <https://doi.org/10.1101/2020.12.27.424485>; this version posted January 11, 2021. The copyright holder for this preprint (which was not certified by peer review) is the author/funder, who has granted bioRxiv a license to display the preprint in perpetuity. It is made available under aCC-BY-NC-ND 4.0 International license.

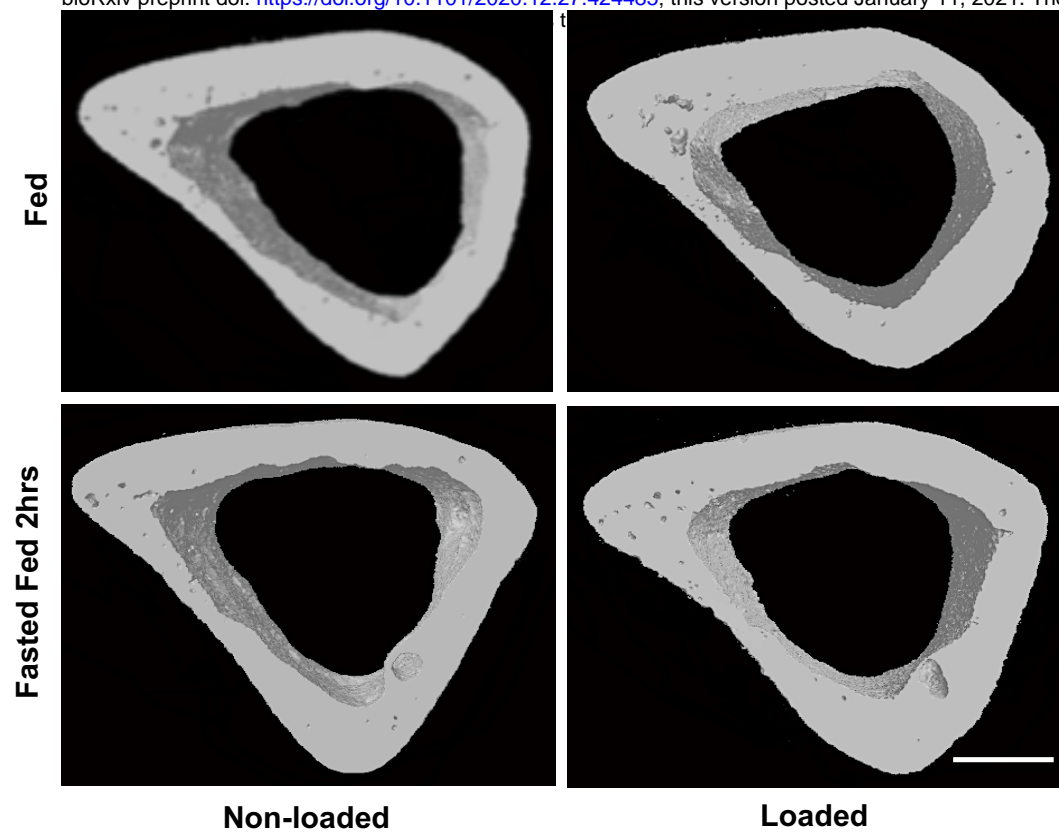**b**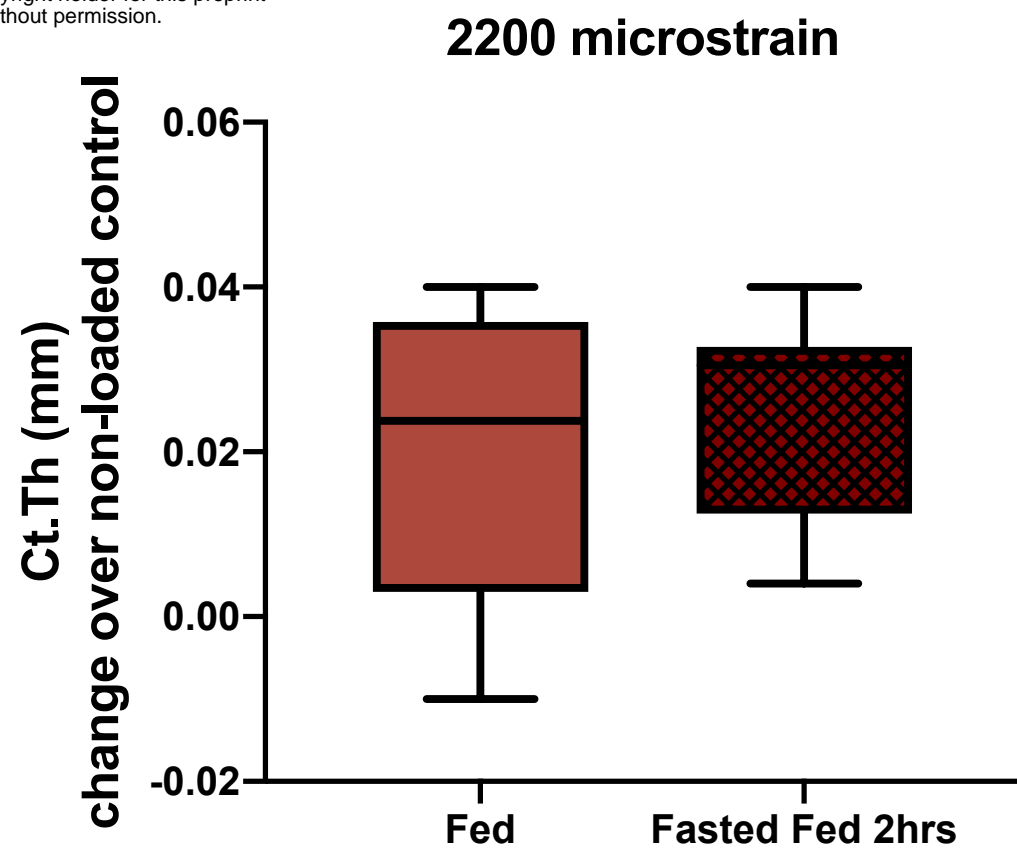**c**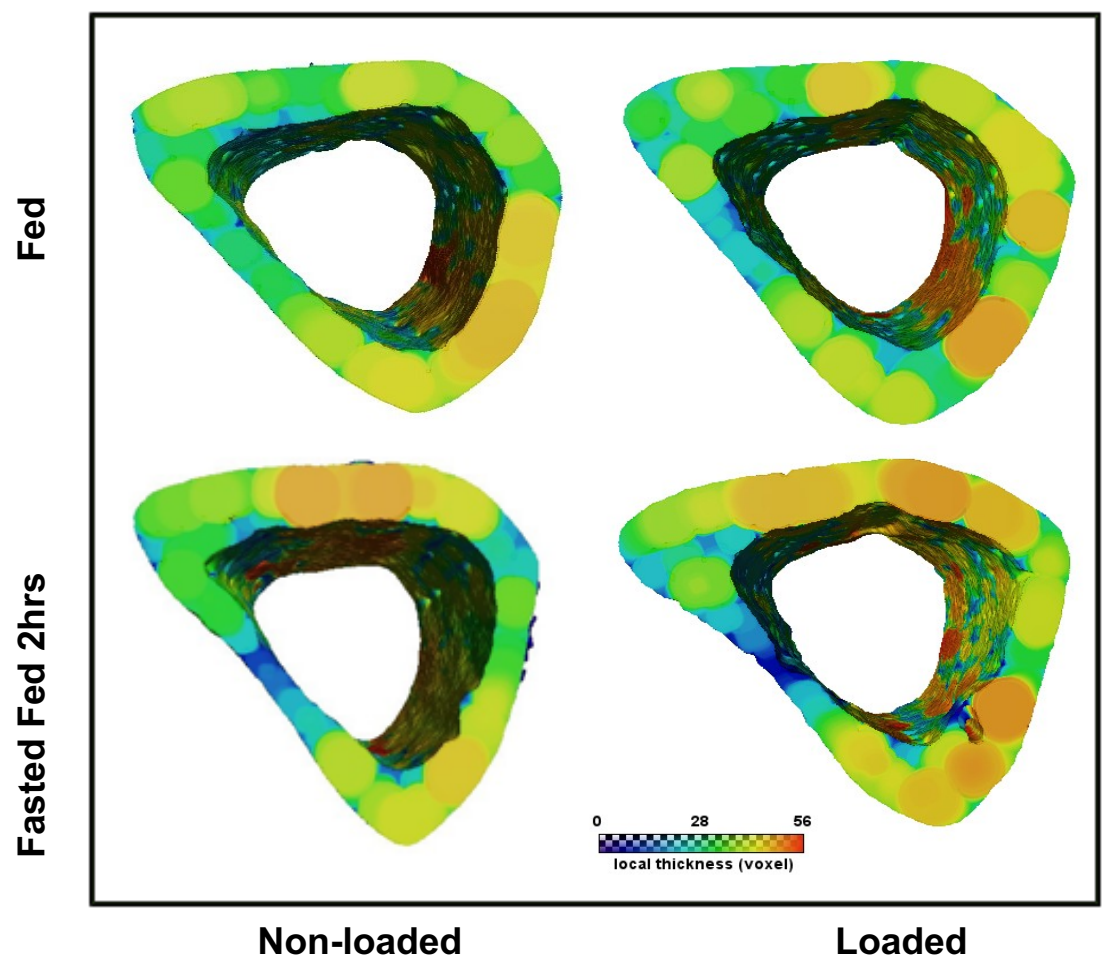**d**

Left Control (Red cross-hatch pattern)  
Right Loaded (Dark Blue)

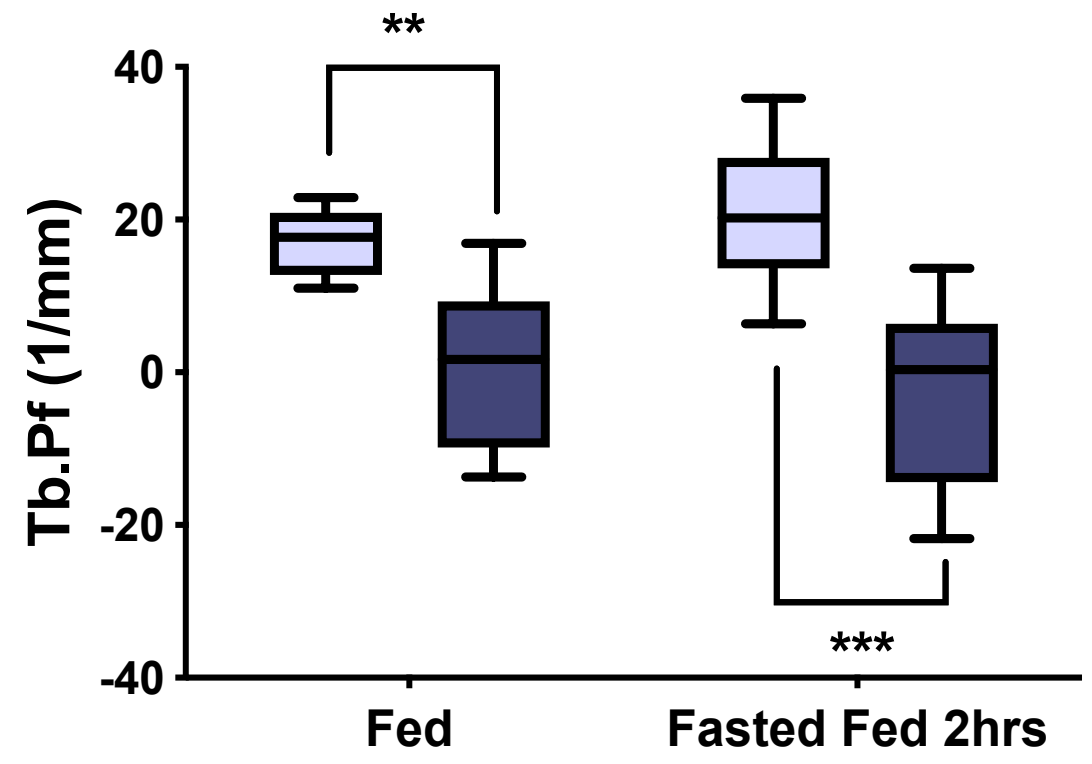



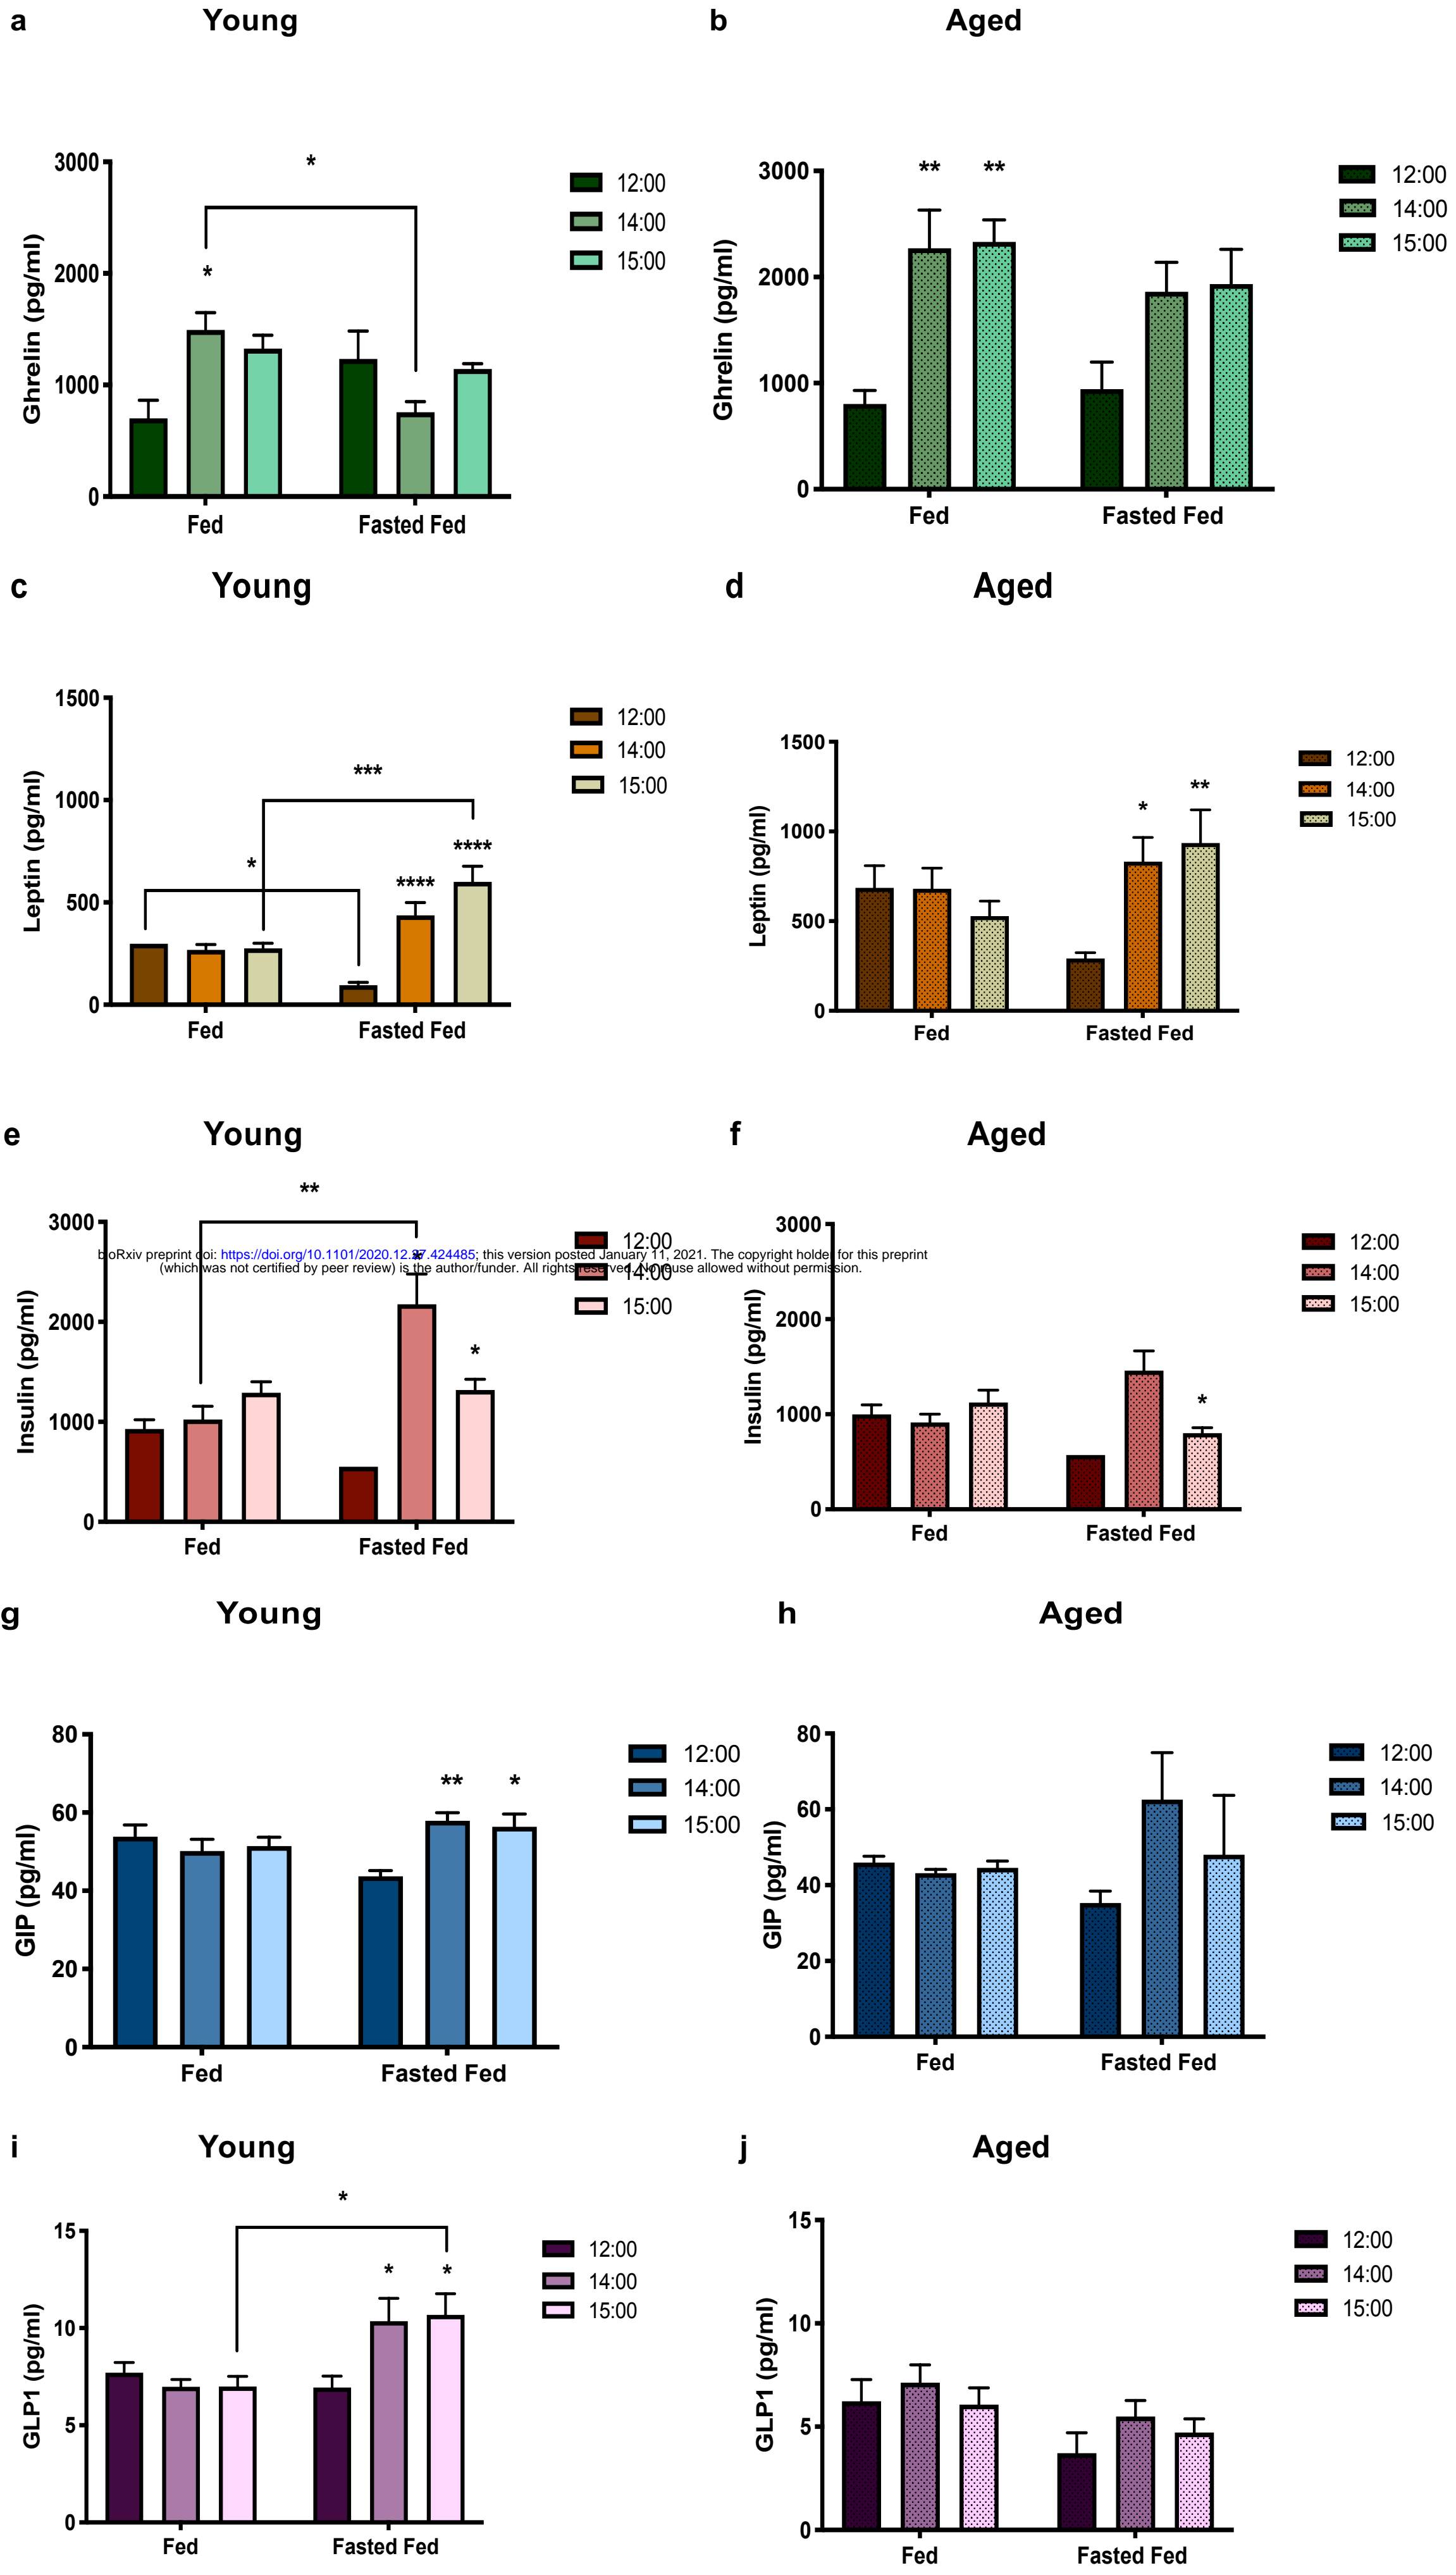

Source: https://www.biorxiv.org/content/10.1101/2020.12.27.424485v2.full.pdf
