1 **Feeding intervention potentiates the effect of mechanical loading to induce new bone formation in mice**

2 **Running title**

3 **Feeding intervention potentiates new bone formation**

4 Hasmik Jasmine Samvelyan<sup>1,2,3,\*</sup>, John Cummings Mathers<sup>1,4</sup>, Timothy Michael Skerry<sup>1,2,\*</sup>

5 <sup>1</sup> MRC-Versus Arthritis Centre for Integrated Research into Musculoskeletal Ageing

6 <sup>2</sup> Mellanby Centre for Bone Research, Department of Oncology and Metabolism, The Medical School,  
7 The University of Sheffield, Beech Hill Road, Sheffield, , UK

8 <sup>3</sup> Present address: Centre for Stress and Age-Related Disease, School of Pharmacy and Biomolecular  
9 Studies, University of Brighton, Brighton, BN2 4GJ, UK. E-mail: [h.samvelyan@brighton.ac.uk](mailto:h.samvelyan@brighton.ac.uk)

10 <sup>4</sup> Human Nutrition Research Centre, Centre for Healthier Lives, Population Health Sciences Institute,  
11 Newcastle University, Framlington Place, Newcastle upon Tyne, NE2 4HH, UK. E-mail:  
12 [john.mathers@newcastle.ac.uk](mailto:john.mathers@newcastle.ac.uk)

13 \*Corresponding authors; Timothy M Skerry (Department of Oncology and Metabolism, The Medical  
14 School, The University of Sheffield, Beech Hill Road, Sheffield, S10, 2RX, UK, Tel: +44 (0) 114 215  
15 9026 E-mail: [t.skerry@sheffield.ac.uk](mailto:t.skerry@sheffield.ac.uk)

16 Hasmik J Samvelyan (Centre for Stress and Age-Related Disease, School of Pharmacy and Biomolecular  
17 Studies, University of Brighton, Brighton, BN2 4GJ, UK. Tel: +44 (0) 127 364 1671 E-mail:  
18 [h.samvelyan@brighton.ac.uk](mailto:h.samvelyan@brighton.ac.uk)

## Abbreviations

|    |                                                  |
|----|--------------------------------------------------|
| 26 |                                                  |
| 27 | Ct.Th cortical bone thickness                    |
| 28 | BFR bone formation rate                          |
| 29 | GIP glucose-dependent insulinotropic polypeptide |
| 30 | GLP1 glucagon-like peptide-1                     |
| 31 | GLP2 glucagon-like peptide-2                     |
| 32 | MAR mineral apposition rate                      |
| 33 | MS mineralising surface                          |
| 34 | Tb.Pf trabecular bone pattern factor             |

## Acknowledgements

35  
36 This study was supported by CIMA (The MRC – Versus Arthritis Centre for Integrated Research into  
37 Musculoskeletal Ageing) (to TMS and JCM; MR/K006312/1) performed as a collaborative project between the  
38 Universities of Sheffield, Newcastle and Liverpool. The authors thank the members of the SkeletAL laboratory,  
39 The University of Sheffield, for tissue processing, Dr Carmen Martin-Ruiz (NIHR Newcastle Biomedical  
40 Research Centre, Ageing Research laboratories) for the analysis of serum cortisol concentrations in young adult  
41 and aged mice.

## Conflict of Interest Statement

42  
43 The authors have stated explicitly that there are no conflicts of interest in connection with this article.

## Author Contributions

44  
45 H. J. Samvelyan performed the research. T. M. Skerry conceived the original idea for the study, H. J. Samvelyan,  
46 J. C. Mathers and T. M. Skerry all contributed to the research design, analysis and interpretation of the data,  
47 drafted, reviewed, edited and approved the version of the manuscript for publication.  
48

55

## Abstract

56 The benefits of increased human lifespan depend upon duration of healthy, independent living; the healthspan. Bone-  
57 wasting disorders contribute significantly to loss of independence, frailty and morbidity in older people. Therefore,  
58 there is an unmet need globally for lifestyle interventions to reduce the likelihood of bone fractures with age.  
59 Although many mechanisms are involved in disorders of bone loss, there is no single regulatory pathway and,  
60 therefore, there is no single treatment available to prevent their occurrence. Our aim in these studies was to determine  
61 whether fasting/feeding interventions alter the effect of mechanical loading on bone anabolic activities and increase  
62 bone mass. In young 17-week-old mice, 16-hour fasting period followed by reintroduction of food for 2 hours  
63 increased markedly the potency of mechanical loading, that mimics the effect of exercise, to induce new cortical  
64 bone formation. Consistent with this finding, fasting and re-feeding increased the response of bone to a loading  
65 stimulus that, alone, does not stimulate new bone formation in ad-lib fed mice. Older mice (20-months) experienced  
66 no potentiation of loading-induced bone formation with the same timing of feeding interventions. Interestingly, the  
67 pre-, prandial and postprandial endocrine responses in older mice were different from those in young animals. The  
68 hormones that change in response to timing of feeding have osteogenic effects that interact with loading-mediated  
69 effects. Our findings indicate associations between timing of food ingestion and bone adaptation to loading. If  
70 translated to humans, such non-pharmacological lifestyle interventions may benefit skeletal health of humans  
71 throughout life-course and in older age.

## 72 **Keywords**

73 aging, analysis of bone, exercise, nutrition, osteoporosis

74

75

76

77

78

79

80

81

## Introduction

The dramatic increase in human life expectancy in the last 60 years has been driven by reduced deaths of people in their 60s and 70s, leading to demographic shifts so that most populations globally are characterised by increasing numbers of older old people<sup>1</sup>. However, an increasing number of these extra years of life are spent in poor health with more years spent in care facilities due to reduced ability to live independently. Osteoporosis is a major contributor to loss of independence due to bone fractures, and resulting hospital treatments lead to significant morbidity. Even after successful fracture treatment, independent living is compromised in many patients<sup>2</sup>. While drug treatments reduce consequences of osteoporosis significantly, there is a pressing need for non-pharmacological interventions to improve bone health across the life-course and to reduce likelihood of age-related bone disease.

Physical activity is beneficial for the skeleton acting through the process of functional adaptation, a process that is less effective in older animals and humans than young ones<sup>3-6</sup>. In addition, older people and those with bone loss, who are already at increased risk of fractures, may be unable to perform exercise that is sufficiently vigorous to strengthen their bones. Since dietary interventions such as energy (caloric) restriction are associated with healthy ageing, a combination of exercise and nutrition may benefit bone health in ageing by utilising synergies between osteotropic influences.

Increased physical activity is beneficial for the skeleton by reducing the rate of age-related loss of bone mass through shifting the balance of bone remodelling in favour of bone formation<sup>7</sup>. However, during ageing skeletal resorption rates are increased with decrease in bone formation rates, resulting in overall net bone loss<sup>8</sup>. Therefore, it is hard for elderly adults and patients with bone wasting disorders to perform vigorous exercise safely, and there is a need to identify effective ways for those people to exercise which produce maximum benefits for the musculoskeletal system without increased risk of injury.

There is complex and coordinated relationship between the endocrine regulation of energy metabolism, adipose tissue and bone homeostasis<sup>9-12</sup>. Specifically, concentrations of hormones including ghrelin, leptin, insulin, amylin, incretins, GIP, GLP1 and GLP2 change profoundly in anticipation of, during or after eating (preprandial, prandial and postprandial responses). These hormones have anabolic effects on bone homeostasis, therefore, synergies between endocrine and mechanical effects could alter with changes in concentrations of these hormones. Indeed, previous studies in model organisms provide evidence of synergistic effects of one of the osteoregulatory hormones; parathyroid hormone and mechanical loading on bone. Parathyroid hormone administration alone induces bone formation but, in combination with mechanical loading, enhances mechanically-induced bone formation synergistically<sup>13-17</sup>.

In this study, we have investigated the synergistic effect of feeding interventions following an overnight fast on the response of bone to mechanical loading in mice and the concurrent role of candidate osteotropic hormones in bone homeostasis. Using a well-established tibial axial loading model<sup>18,19</sup>, we performed experiments to

determine osteogenic effects of different mechanical loading regimens after periods of withholding food (fasting) or feeding in young (17-19 week-old) and aged (20-month-old) male C57BL/6 mice. We measured new bone formation in these mice using micro-computed tomography and dynamic histomorphometry. To explore possible mechanisms by which fasting/feeding interventions could have their effect, we measured changes in serum concentrations of a range of candidate osteotropic hormones in response to feeding in fed and fasted fed young and aged mice using a multiplex assay.

## Materials and Methods

### *Animals*

Male C57BL/6 wild type mice at 16 weeks of age (young adult) and 20 months of age (aged) were obtained from Charles River Laboratories Inc. (Margate, UK). The mice were caged separately and acclimatised to their surroundings for 7 days. All mice were allowed free access to water and a maintenance diet ad libitum (2018C Teklad Global 18% Protein Rodent Diet; Madison, WI, USA, Supplementary Table S1) in a 12-hour light/dark cycle at a room temperature of  $21 \pm 2^{\circ}\text{C}$  and relative humidity of  $55 \pm 10\%$ . Cages contained wood shavings, bedding and metal rings for mice to play. All procedures complied with the United Kingdom Animals (Scientific Procedures) Act 1986 (ASPA) and were reviewed and approved by the University of Sheffield Research Ethics Committee (Sheffield, UK). 3Rs principle followed as the ethical framework for conducting all the scientific experiments.

### *Assessment of feeding behaviour of fed or fasted young and aged mice*

Groups of young adult male mice at 17 weeks of age and aged male mice at 20 months of age were either allowed access to a maintenance diet ad libitum or fasted overnight for 16 hours and were assessed for subsequent feeding behaviour. The nesting material, bedding and wood shavings were removed from the cages prior to the experiment. All mice were allowed free access to water. Food intake was measured by monitoring the consumed food and body weights of animals every 30 minutes for the first 3 hours then every hour for another 4 hours twice weekly for one week. After the experiments mice were placed in new cages with wood shavings and bedding.

### *In vivo non-invasive axial mechanical loading of knee joints*

The right tibia of each mouse was subjected to non-invasive, dynamic axial mechanical loading under the isoflurane-induced anaesthesia (liquid isoflurane was vaporised to a concentration of 5% and maintained at a concentration of 3% with oxygen) for 7min/day, 3 alternate days a week for 2 weeks according to the protocols described in the previous studies<sup>16,18</sup>. The left tibiae were non-loaded internal controls. To apply mechanical loading, mice were anaesthetised, and the knee and ankle joints of the right limbs were fixed in customised

146 concave cups. The knee was positioned into the upper cup, which was attached to the activator arm displacement  
147 transducer and the ankle in the lower cup attached to the dynamic load cell. The tibia was held in place by  
148 continuous static preload of 0.5N onto which dynamic loads were superimposed in a series of 40 trapezoidal  
149 shaped waveform cycles with steep up and down ramps with a high dwell time of 0.25s and 9s low dwell 'rest  
150 interval' between each cycle. The load was applied to engender the required magnitude of strain on the bones of  
151 animals in each of the age groups<sup>20</sup>. The engendered average strain rate was 30000 $\mu\epsilon$ /s, which is shown to be  
152 equivalent to physiological strain rates<sup>21</sup>.

### 153 *Calcein administration*

154 150mg of calcein powder was added to 50ml dH<sub>2</sub>O. Then 0.1g of NaHCO<sub>3</sub> was added to neutralise the pH of the  
155 solution. The solution was protected from light with aluminium foil. After the solution was fully dissolved, it was  
156 filter-sterilized at 0.22 $\mu$ m into autoclaved vials also protected from light with aluminium foil. The pH of the  
157 solution was measured with a bench pH-meter and corrected to neutral pH 7 with HCl or NaOH. The calcein  
158 solutions were made on the same days prior to the experiments ensuring no loss of fluorescence from the  
159 fluorochrome label. Calcein was administered at a concentration of 30mg/kg in 0.2% NaHCO<sub>3</sub> solution  
160 subcutaneously on the first and last days of mechanical loading (days 1 and 12) using insulin syringes<sup>22</sup>.

### 161 *Micro-computed tomography ( $\mu$ CT) analysis*

162 The tibiae were collected after mice were culled, and loading responses of bones determined by  $\mu$ CT using a  
163 SkyScan 1172 (Bruker MicroCT, Kontich, Belgium). Since mouse bones are small, and axial loading related  
164 osteogenesis is site-specific, high-resolution  $\mu$ CT analysis was used primarily to quantify three-dimensional (3D)  
165 bone microarchitecture at comparable sites (proximal and mid-shaft regions) of loaded and contralateral non-  
166 loaded control tibiae. The tibiae were stored in 70% EOH and mounted in a plastic tube wrapped in cling film to  
167 prevent drying during scanning. The high-resolution scans were imaged with a pixel size of 4.3 $\mu$ m. The applied  
168 X-ray voltage was 50kV, X-ray intensity 200 $\mu$ A with a 0.5mm aluminium filtration. The scans were taken over  
169 180 degrees with a 0.7-degree rotation step. The images were reconstructed and binarised with a threshold of 0  
170 to 0.16, ring artefact reduction was set at 10 and beam hardening correction at 0% using the SkyScan NRecon  
171 software package (version 1.6.9.4, Bruker MicroCT, Kontich, Belgium). The images then were realigned  
172 vertically using DataViewer software (version 1.5.1.2 64-bit) before the 3D quantification.

### 173 *3-dimensional (3D) and colour coded analysis*

174 Structural parameters were calculated using SkyScan Ct.An software (Bruker MicroCT, Kontich, Belgium) for  
175 cortical bone 1-mm-long section at the mid-shaft of the tibia with an offset of 0.5mm, and for trabecular bone -

176 secondary spongiosa, 1mm distal to the tibial proximal growth plate with an offset of 0.2mm ensuring the growth  
177 plate was not included in the analysis. In the trabecular region, an irregular, anatomic region of interest (ROI)  
178 adjacent to the endocortical boundary was analysed. Two ROIs were drawn to analyse the cortical region  
179 including ‘doughnut’ shaped ROI and ‘crude’ ROI around the outside of the bone.

180 The bone mass, architecture and changes due to the mechanical loading were evaluated in cortical and trabecular  
181 bone regions according to the guidelines for the assessment of bone microstructure in rodents using  $\mu$ CT<sup>23</sup>. 3D  
182 representations of the bones were created using the Voxler software (Golden Software Inc., 2006). The local bone  
183 thickness (Th; voxel) was determined and colour-coded thickness images were generated using the Avizo®  
184 (version 8.0, VSG, Burlington, VT, USA) software.

### 185 *Bone dynamic histomorphometry*

186 After  $\mu$ CT scanning and being fixed in 70% EOH for a minimum of 48hrs, the mouse bones were infiltrated in  
187 increasing concentrations of alcohol (80% IMS alcohol, 80% IMS alcohol, 100% IMS alcohol, 100% IMS  
188 alcohol, 100% EOH, 100% EOH and 100% EOH) on a shaker at room temperature for 48hrs at each  
189 concentration. Bones were then infiltrated in glass bottles with medium grade LR White resin at 4°C for 6 days,  
190 resin was changed every 48hrs. The sample bottles were agitated gently and continuously on a shaker for a  
191 duration of the infiltration at 4°C. Next, the bones were placed longitudinally and diagonally in plastic moulds  
192 fully filled with fresh resin and covered with labelled plastic embedding stubs at room temperature. Resin was  
193 then allowed to polymerise at 55°C overnight for up to 24hrs until it was hard. After polymerisation, blocks were  
194 removed from the moulds and protected from the light during the storage and subsequent use. The bones were  
195 protected from the light at all stages of the processing to prevent the loss of fluorescence from the labels.

### 196 *Sectioning and visualisation*

197 The bones were reoriented vertically, then 8 $\mu$ m thick transverse sections were obtained from the cortical ROI  
198 corresponding to the mid-shaft of the tibiae and as determined by  $\mu$ CT, using the tungsten carbide-tipped 16cm  
199 microtome knife on the rotary microtome. Sections were unrolled and floated onto a drop of the dH<sub>2</sub>O on a  
200 labelled Superfrost Plus glass slides using fine paintbrush and forceps. The slides were covered with Saran wrap  
201 and wrapped with blotting paper making sure the Saran wrap-covered sections were flat without creases or  
202 residual water. The slides then were dried at 50°C overnight stacked in the slide clump to aid adherence of bones  
203 sections. After peeling off the Saran wraps slides were mounted in the xylene for 2-3min and then covered with  
204 glass coverslip using DPX mountant. Images of calcien labelled transverse bone sections were visualised using  
205 Leica fluorescent microscope at 4x and 10x magnifications. All slides were stored protected from the light until  
206 time for histomorphometry analysis.

## 207 ***Measurements of bone formation parameters***

208 The histological assessment of bone phenotypes was carried out by dynamic histomorphometry measuring its  
209 derived kinetic indices<sup>24</sup>. A Leica microscope was set up for fluorescence before placing the slides with calcein  
210 labeled sections under the microscope. To reach its full output, the fluorescent lump was allowed to warm up for  
211 5min before measurements were made. Bone formation parameters including mineralising surface (MS), mineral  
212 apposition rate (MAR) and bone formation rate (BFR) were measured using the OsteoMeasure software (version  
213 3.3.0.2).

## 214 ***Blood collection***

215 Small blood volumes were obtained from the mice by tail vein sampling technique with assistance from the  
216 Biological Services Unit at the Royal Hallamshire Hospital of The University of Sheffield. To avoid hyperthermia  
217 and dehydration and reduce stress levels, this technique was performed without warming mice in the warming  
218 cabinet prior to taking the blood samples. Mice were gently placed in the restraint tube and lateral tail veins were  
219 accessed by making incisions in approximately one-third from the proximal end along the length of the tails<sup>25</sup>.  
220 Repeated blood micro samples (typically  $\leq 50\mu\text{l}$ ) were collected from the lateral mouse-tail veins 3 times in any  
221 one 24-hour period.

## 222 ***Mouse multiplex metabolic hormone assay***

223 Serum ghrelin, leptin, insulin, GIP and GLP1 concentrations were assayed in mouse sera using mouse multiplex  
224 assay (Bio-Rad, Watford, UK) following manufacturer's instructions. The mouse assay is magnetic bead-based  
225 multiplex assay that allows measurement of multiple proteins in small volumes of sera. Briefly, a 96-well plate  
226 was pre-coated with  $50\mu\text{l}$  of beads coupled with the capture antibodies. After washing twice with wash buffer,  
227  $50\mu\text{l}$  of standards, blank and serum samples were added into the wells, incubated at room temperature with  
228 shaking for 1hr, washed and followed by addition of the detection antibodies and streptavidin-phycoerythrin (SA-  
229 PE) conjugates. Following incubation at room temperature with shaking, the plate was washed three times with  
230 wash buffer and beads were resuspended in  $125\mu\text{l}$  assay buffer with shaking at 850rpm for 30s. The plate was  
231 then read on Bio-Plex system using Bio-Plex Manager software (v 6.0). Samples (pg/ml) were assessed in  
232 duplicate.

## 233 ***Serum cortisol analysis***

234 Cortisol concentrations were measured in mouse sera by a solid phase competitive enzyme linked immunosorbent  
235 assay (ELISA) (Sigma-Aldrich Co Ltd, USA) according to the manufacturer's protocol. Prior to the assay the  
236 frozen sera were thawed at a room temperature and mixed well using vortexer. Briefly,  $25\mu\text{l}$  of mouse serum was



added into each microwell of the plate, coated with the anti-cortisol MAb, along with the standards for 6-point standard curve (1-80ng/ml), blank and internal control. After incubation at room temperature with shaking for 60min, wells were washed three times with wash buffer and treated with 3,3',5,5' - Tetramethylbenzidine (TMB) substrate for 15min. The colorimetric reaction was then stopped and absorbance was measured at 450nm on ELISA reader. A 4-parametre logistic regression was applied to the standard curve for the calculation of cortisol concentrations in the samples (ng/ml). Samples were assessed in duplicate.

### ***Statistical analysis***

All analyses were performed using GraphPad Prism software 6.0f version (GraphPad Inc, La Jolla, CA, USA). The results were presented as the mean  $\pm$  standard error (SEM). The Normal distribution of data was assessed using the Shapiro-Wilk normality test. Statistical significance was tested using parametric statistical tests. For comparing two groups, two-tail Student's *t*-test (paired or unpaired) was used. For comparing more than two groups, two-way ANOVA (analysis of variance) was used with Tukey post-hoc test to assess the effect of loading, fasting/feeding and interactions within and across the experimental groups. The significance was set at  $p < 0.05$ .

## **Results**

### ***The effect of 16-hour food restriction on feeding behaviour of male mice***

To establish a robust model to study the effect of timing of feeding on bone's response to loading, we first assessed the effect of overnight, 16-hour food removal on subsequent feeding behaviour of young (17-18 weeks old) and aged (20-month-old) male C57BL/6 mice. The results provided insights into dynamics of the homeostatic feeding response and showed that both young adult (Figure 1a) and aged (Figure 1b) male mice exhibited a similar 2-hour hyperphagic response following fasting before returning to the same food intake as mice that had unrestricted access to a normal chow ad libitum for the whole period of experiment (Figure 1a, b).

### ***Feeding intervention potentiates adaptive response of the bones to mechanical loading in young mice***

Next we compared bone formation responses in ad-lib fed animals and in mice fasted overnight and then allowed free access to maintenance diet for 1, 2 or 3 hours before loading. To mimic osteogenic exercise, compressive forces were applied between the hock (ankle) and stifle (knee) joints to induce deformation of the tibiae. Different loading regimens comprised 40 cycles of compressive force at high physiological strain rate to peak strain magnitudes of 2200, 1300 or 1100 microstrain, followed by a brief hold of 0.25 seconds, and a rapid symmetrical reduction in loading, with a 9 second rest period before the next compression. The three strain magnitudes corresponded to maximal, sub-maximal and sub-threshold stimuli respectively. Loading was applied on Monday, Wednesday and Friday of 2 successive weeks, at 1, 2 or 3 hours after food had been re-introduced to 16-hour fasted mice, or at the same time of day in ad-lib fed animals (Supplementary Figure S1).

Using a high resolution  $\mu$ CT analysis of the cortical bone at the mid-shaft region of loaded tibiae, we found the expected responses to loading at high physiological strains with significant adaptive response in the mice fed ad-lib. However, in mice that were fasted then fed for 2 hours, the change in cortical bone thickness induced by maximal loading was increased by 36% compared with responses of mice fed ad-lib before the loading ( $0.049 \pm 0.007$ mm in fasted/fed loaded tibiae compared with that in ad-lib fed mice  $0.036 \pm 0.004$ mm,  $p < 0.05$ ) (Figure 2a, c, d). The histomorphometric data were consistent with the  $\mu$ CT measurements (Figure 2b, Table 1). Colour-coded analysis revealed anatomical variation in cortical bone thickness between loaded and non-loaded tibiae of fasted fed and ad-lib fed mice (Figure 2d). Differences in the cortical bone thickness of loaded tibiae were particularly apparent between fasted/fed and ad-lib fed mice and correlated with  $\mu$ CT analysis. There was no significant induction of bone formation in non-loaded legs of either ad-lib or fasted/fed mice over the period of the experiment.

In animals fed for 1 or 3 hours after the end of fasting, the mean cortical thickness increased compared with ad lib-fed controls, but the difference was not significant. Trabecular bone parameters were improved by loading in both fasted and ad-lib fed groups and at all 3 times after re-introduction of food, but were not significantly different between feeding interventions.

### ***Load magnitude-related adaptive response of the cortical bone is potentiated by feeding intervention in young mice***

We then determined effects of fasting and 2-hour feeding regimen on bone response to loading which, in ad-lib fed mice, induced less than maximal bone formation. In mice, whose bones were loaded to induce peak strain magnitudes of 1300 microstrain, a sub-maximal stimulus, loading after fasting and feeding increased cortical thickness by 13% compared with ad-lib fed mice (fasted/fed:  $0.27 \pm 0.007$ mm loaded limb versus  $0.24 \pm 0.003$ mm control limb,  $p < 0.05$ ; ad-lib fed:  $0.26 \pm 0.004$ mm versus  $0.24 \pm 0.004$ mm,  $p < 0.05$ ) (Figure 3b). Finally, we investigated the effects of a sub-threshold stimulus (1100 microstrain), not capable of inducing new bone formation in ad-lib fed mice. Remarkably, that previously ineffective stimulus together with imposition of the fasting/re-feeding regimen resulted in an 8% increase in cortical thickness (fasted/fed:  $0.26 \pm 0.008$ mm loaded limb versus  $0.24 \pm 0.008$ mm control limb,  $p < 0.05$ ; ad-lib fed:  $0.26 \pm 0.002$ mm versus  $0.25 \pm 0.004$ mm,  $p > 0.05$ ) (Figure 3a). We did not detect significant changes in trabecular bone parameters in these studies.

### ***Adaptive response of bones to mechanical loading in aged mice is not potentiated by the same feeding intervention that is effective in young mice***

We then compared effects of fasting/feeding regimens on load-induced bone formation in older 20-month-old mice, but observed no potentiation effect of loading of the fasting and 2 hour feeding regimen that we had seen in younger mice (cortical bone thickness fasted/fed:  $0.23 \pm 0.002$ mm loaded limb versus  $0.21 \pm 0.004$ mm control

limb,  $p < 0.05$ ; ad-lib fed:  $0.24 \pm 0.01\text{mm}$  versus  $0.21 \pm 0.007\text{mm}$ ,  $p < 0.05$ ) (Figure 4a-c). Colour-coded analysis revealed no anatomical variation in cortical bone thickness between loaded and non-loaded tibiae of fasted fed and ad-lib fed aged mice (Figure 4c).

Despite deterioration of the trabecular bone in these aged mice, trabecular bone pattern factor decreased significantly in both fed and fasted 2-hour fed mice (fasted/fed:  $-2.3 \pm 4.3\text{mm}^{-1}$  loaded limb versus  $20.8 \pm 3.3\text{mm}^{-1}$  control limb,  $p < 0.001$ ; ad-lib fed:  $0.7 \pm 3.7\text{mm}^{-1}$  versus  $17.3 \pm 1.5\text{mm}^{-1}$ ,  $p < 0.01$ ) (Figure 4d). Similarly, there was no significant change of bone formation in non-loaded legs of either ad-lib or fasted/fed aged mice over the period of the experiment.

### ***Regulation of bone homeostasis by endocrine hormones differ between young and aged mice***

Next we assessed changes in circulating concentrations of gastro-entero-pancreatic hormones in response to fasting and feeding, which may contribute to observed potentiating effects. We measured concentrations of a range of hormones with known effects on bone homeostasis in young and old mice, in both ad-lib fed and fasted/fed groups. Since both young and aged mice previously exhibited a similar 2-hour hyperphagic response following fasting before returning to the same food intake, serum concentrations of ghrelin, leptin, pancreatic hormone insulin, and intestinal peptides GIP and GLP1 were measured at 3 time points (overnight 16-hour fasted at 12:00 noon on the day following the fast, then 2 hours and 3 hours after initiating food intake at 14:00 and 15:00 respectively) using a multiplex metabolic assay. Endocrine profiles differed between young and aged mice. Fasting and feeding changed circulating serum concentrations of ghrelin, leptin, insulin and GLP-1, but not GIP in young mice (Table 2). In older mice, absolute concentrations of hormones were different, but differences between ad-lib fed and fasted fed mice were not significant (Table 3).

Ghrelin concentrations fell significantly 2 hours after initiating food intake in young mice, but remained high in older animals (Figure 5a, b). In fasted fed young and aged mice, serum leptin concentrations increased significantly at 14:00 and 15:00 compared with those at 12:00, whereas in ad-lib fed mice remained unchanged. Fasting serum concentration of leptin was significantly lower at 12:00 and significantly higher at 15:00 in fasted fed young mice compared to those in ad-lib fed mice (Figure 5c and d). In fasted fed young mice serum insulin concentration significantly increased from 12:00 to 14:00 and in comparison to that in ad-lib fed mice, then significantly decreased at 15:00 (Figure 5e). In fasted fed aged mice, serum insulin concentration increased but not significantly from 12:00 to 14:00, then significantly decreased at 15:00 compared to that at 14:00, whereas serum insulin concentrations remained unchanged in ad-lib fed aged mice (Figure 5f). In fasted fed young mice, serum GIP and GLP1 concentrations significantly increased at 14:00 and 15:00 compared with those at 12:00 and remained unchanged in ad-lib fed mice (Figure 5g, i). Serum GLP1 concentration was significantly higher at 15:00 in fasted fed mice compared to that in ad-lib fed mice (Figure 5i). There were no significant changes in serum GIP and GLP1 concentrations within and between fed and fasted fed aged mice (Figure 5h, j).

## Discussion

These data provide compelling evidence for a link between variations in timing of feeding and adaptive responses of bone to loading. Age-related bone loss across multiple sites within the skeleton suggests that systemic regulation plays an essential role in bone homeostasis. Concentrations of a number of gastro-entero-pancreatic hormones change before, during and after feeding, which have direct or indirect effects on bone cells. We interpret the data from this study to provide proof-of-principle that the effects of anabolic hormones in increasing bone formation in response to mechanical loading may be manipulated by changing timing of feeding in relation to exercise imposition. It has been previously shown that parathyroid hormone (an osteotropic hormone) administration potentiates effects of loading(14–16), but this study is the first report of a non-pharmacological intervention with such effects. The ability of feeding interventions to amplify the effects of loading stimuli is compelling, but its ability to turn a sub-threshold stimulus (one which alone does not stimulate any adaptive bone responses) into one causes significant new bone formation has potentially pervasive implications.

Our study of the fasting/2-hour feeding before mechanical loading in older mice did not recapitulate results seen in younger animals. Measurement of hormones in our studies gives clues to possible explanations for differences in adaptive responses of bones between young and aged mice as in the data on 5 different hormones, we determined clear differences in changes over the fasting/feeding/loading period in the two age groups. Age-related impairment of the function of mechanostat and decline of the skeletal robustness may have also reduced sensitivity of the cortical bone to mechanical stimulation in aged male mice. Further, the altered cortical bone response to the strain-related stimulus in aged male mice compared to young ones may reflect the deficiencies in osteoblast recruitment, differentiation and function. However, one limitation of this study is that we did not examine different timings of fasting and feeding in old mice as we had in young mice.

We were conscious that repeated blood sampling from mice could be stressful, and that such stress might affect levels of the hormones we wished to measure. However, assessments of serum cortisol concentrations during those blood sampling studies showed no significant changes suggesting minimal impact of the procedure on stresses experienced by the mice (Supplementary Figure S2).

Currently, although the effects we demonstrate are potent and robust, we have only association between the changes in bone responses and the hormonal alterations before, during and after feeding. There are however, compelling data on the way that such hormonal changes occur, and it is appropriate to consider some of the possible candidates in this connection.

Leptin is well recognised as a bone anabolic hormone, with its own effects mediated by central and peripheral mechanisms as well as those through other central relays<sup>26</sup>. We found like others before, that leptin concentrations are lower in fasted mice and that they increase following feeding<sup>27–29</sup>. It is known that leptin increases bone formation<sup>30,31</sup>, although to our knowledge, there are no reports of concurrent administration of leptin and loading of bones.

367 Ghrelin is thought to be antagonistic to leptin, has direct effects on bone homeostasis both *in vivo* and *in vitro*<sup>32,33</sup>  
368 and changes during fasting and in advance of feeding<sup>34,35</sup>. The high circulating ghrelin concentrations during  
369 fasting and then low concentrations after food intake would be consistent with an influence of the leptin/ghrelin  
370 axis on the loading related bone formation that we demonstrate.

371 Insulin increases bone formation and decreases bone resorption both *in vivo* and *in vitro*<sup>36-38</sup>. During fasting  
372 circulating insulin concentrations are low (basal condition) and as eating commences, plasma insulin  
373 concentrations rise to regulate blood glucose concentrations. These elevated levels would be consistent with a  
374 potentiated anabolic bone response to loading. Specifically, we demonstrate that 2-hours of feeding after fasting  
375 increased serum insulin concentrations in young mice. The lack of similar change in insulin in the older mice is  
376 consistent with our demonstration that the same potentiation did not occur in them. As insulin has promiscuous  
377 effects on IGF receptors, which are expressed on osteoblasts<sup>39</sup>, it is likely that any insulin-mediated effect is  
378 complex.

379 GIP is a bone anabolic *in vitro*<sup>40,41</sup> and mice overexpressing GIP have increased bone mass<sup>42</sup>. Similarly, GLP1  
380 receptors are expressed on osteoblasts, bone marrow stromal cells<sup>43</sup> and on thyroid C cells<sup>44</sup>, so GLP1 has the  
381 potential for direct and indirect actions on bone. However, as the concentrations of both hormones were  
382 unchanged in aged mice by our interventions we conclude that impairment of GIP or GLP1 signalling in bone  
383 cells are likely to be involved in attenuated bone response we observed. The roles of these different hormones  
384 could be clarified by interventional studies where hormones were administered in order to mimic the  
385 fasting/feeding changes, or in knockout or over-expressing mice, but those studies are beyond the scope of this  
386 research and any single report.

387 While fasting mice for 16 hours is a much more significant period of food deprivation than overnight fasting in  
388 humans, it is possible that similar biological interactions occur in humans, that could be exploited to benefit bone  
389 health. Future studies may allow us to determine whether such potentiating effects are observed in humans and  
390 what recommendations can be made to humans with respect to timing, amount and composition of food ingestion  
391 to obtain the maximal benefits from exercise. If we can identify interventions that potentiate bone's response to  
392 exercise in young humans, then such interventions would increase adult bone mass so that with ageing, the  
393 additional strength of bones would extend time before osteoporotic "fracture thresholds" were reached. If similar  
394 interventions were identified in older mice and then humans too, then they could be translatable into a non-  
395 pharmacological way to improve bone health of older people. There are already widespread fasting and caloric  
396 restriction interventions in use in humans for weight control and for healthy ageing<sup>45</sup>. In particular, the 5:2 diet in  
397 which food intake is restricted to 500 – 600 calories on two days per week, which could be exploited to provide  
398 the equivalent of fast experienced by mice in this study. The likelihood that effects we show here could be  
399 translatable to humans has been increased by a recent study<sup>46</sup> that showed in postmenopausal women eating only

twice daily, positive effects of treadmill exercise on serum biomarkers of bone formation, one hour after eating but not 1 hour before eating.

### Acknowledgements

This study was supported by CIMA (The MRC – Versus Arthritis Centre for Integrated Research into Musculoskeletal Ageing) (to TMS and JCM; MR/K006312/1) performed as a collaborative project between the Universities of Sheffield, Newcastle and Liverpool. The authors thank the members of the Skeletal laboratory, The University of Sheffield, for tissue processing, Dr Carmen Martin-Ruiz (NIHR Newcastle Biomedical Research Centre, Ageing Research laboratories) for the analysis of serum cortisol concentrations in young adult and aged mice.

### Conflict of Interest Statement

The authors have stated explicitly that there are no conflicts of interest in connection with this article.

### Author Contributions

H. J. Samvelyan performed the research. T. M. Skerry conceived the original idea for the study, H. J. Samvelyan, J. C. Mathers and T. M. Skerry all contributed to the research design, analysis and interpretation of the data, drafted, reviewed, edited and approved the version of the manuscript for publication.

### References

1. He W, Goodkind D, Kowal P. An Aging World : 2015 International Population Reports. *Aging (Albany NY)*. 2016;(March):165. doi:P95/09-1
2. Schemitsch EH, Sprague S, Heetveld MJ, et al. Loss of Independence After Operative Management of Femoral Neck Fractures. *J Orthop Trauma*. 2019;33(6):292-300. doi:10.1097/BOT.0000000000001444
3. Wolff J. Ueber die innere Architectur der Knochen und ihre Bedeutung für die Frage vom Knochenwachsthum. *Arch Für Pathol Anat Physiol Für Klin Med*. 1870;50:389–450.
4. Frost HM. On the strength-safety factor (SSF) for load-bearing skeletal organs. *J Musculoskeletal Neuronal Interact*. 2003;3(2):136-140.
5. Bonnet, Nicolas and Ferrari SL. Exercise and the Skeleton: How It Works and What It Really Does. *IBMS Bonekey*. 2010;7(7):235-248. doi:10.1138/20100453
6. Konda NN, Karri RS, Winnard A, et al. A comparison of exercise interventions from bed rest studies for the prevention of musculoskeletal loss. *npj Microgravity*. 2019;5(1). doi:10.1038/s41526-019-0073-4
7. Gonzalo-Encabo P, McNeil J, Boyne DJ, Courneya KS, Friedenreich CM. Dose-response effects of exercise on bone mineral density and content in post-menopausal women. *Scand J Med Sci Sport*. 2019;29(8):1121-1129. doi:10.1111/sms.13443
8. Raisz LG, Seeman E. Causes of age-related bone loss and bone fragility: An alternative view. *J Bone Miner Res*. 2001;16(11):1948-1952. doi:10.1359/jbmr.2001.16.11.1948
9. Perrini S, Laviola L, Carreira MC, Cignarelli A, Natalicchio A, Giorgino F. The GH/IGF1 axis and

- 434 signaling pathways in the muscle and bone: Mechanisms underlying age-related skeletal muscle wasting  
435 and osteoporosis. *J Endocrinol.* 2010;205(3):201-210. doi:10.1677/JOE-09-0431
- 436 10. D'Amour P. Acute and chronic regulation of circulating PTH: Significance in health and in disease. *Clin*  
437 *Biochem.* 2012;45(12):964-969. doi:10.1016/j.clinbiochem.2012.04.029
- 438 11. Govoni KE. Insulin-like growth factor-I molecular pathways in osteoblasts: potential targets for  
439 pharmacological manipulation. *Curr Mol Pharmacol.* 2012;5(2):143-152.
- 440 12. De Paula FJA, Rosen CJ. Bone Remodeling and Energy Metabolism: New Perspectives. *Bone Res.*  
441 2013;1:72-84. doi:10.4248/BR201301005
- 442 13. Ma Y, Jee WSS, Yuan Z, et al. Parathyroid hormone and mechanical usage have a synergistic effect in  
443 rat tibial diaphyseal cortical bone. *J Bone Miner Res.* 1999;14(3):439-448.  
444 doi:10.1359/jbmr.1999.14.3.439
- 445 14. Kim CH, Takai E, Zhou H, et al. Trabecular Bone Response to Mechanical and Parathyroid Hormone  
446 Stimulation: The Role of Mechanical Microenvironment. *J Bone Miner Res.* 2003;18(12):2116-2125.  
447 doi:10.1359/jbmr.2003.18.12.2116
- 448 15. Li J, Duncan RL, Burr DB, Gattone VH, Turner CH. Parathyroid hormone enhances mechanically  
449 induced bone formation, possibly involving L-type voltage-sensitive calcium channels. *Endocrinology.*  
450 2003;144(4):1226-1233. doi:10.1210/en.2002-220821
- 451 16. Sugiyama T, Saxon LK, Zaman G, et al. Mechanical loading enhances the anabolic effects of intermittent  
452 parathyroid hormone (1-34) on trabecular and cortical bone in mice. *Bone.* 2008;43(2):238-248.  
453 doi:10.1016/j.bone.2008.04.012
- 454 17. Shibamoto A, Ogawa T, Duyck J, Vandamme K, Naert I, Sasaki K. Effect of high-frequency loading and  
455 parathyroid hormone administration on peri-implant bone healing and osseointegration. *Int J Oral Sci.*  
456 2018;10(1):1-7. doi:10.1038/s41368-018-0009-y
- 457 18. De Souza RL, Matsuura M, Eckstein F, Rawlinson SCF, Lanyon LE, Pitsillides AA. Non-invasive axial  
458 loading of mouse tibiae increases cortical bone formation and modifies trabecular organization: A new  
459 model to study cortical and cancellous compartments in a single loaded element. *Bone.* 2005;37(6):810-  
460 818. doi:10.1016/j.bone.2005.07.022
- 461 19. Sugiyama T, Meakin LB, Browne WJ, Galea GL, Price JS, Lanyon LE. Bones' adaptive response to  
462 mechanical loading is essentially linear between the low strains associated with disuse and the high  
463 strains associated with the lamellar/woven bone transition. *J Bone Miner Res.* 2012;27(8):1784-1793.  
464 doi:10.1002/jbmr.1599
- 465 20. Meakin LB, Galea GL, Sugiyama T, Lanyon LE, Price JS. Age-related impairment of bones' adaptive  
466 response to loading in mice is associated with sex-related deficiencies in osteoblasts but no change in  
467 osteocytes. *J Bone Miner Res.* 2014;29(8):1859-1871. doi:10.1002/jbmr.2222

- 468 21. Fritton SP, Rubin CT. In vivo measurement of bone deformations using strain gauges. *Bone Mech*  
469 *Handbook, Second Ed.* 2001;(March 2019):8-1-8-42. doi:10.1201/b14263-11
- 470 22. Hillam RA, Skerry TM. Inhibition of bone resorption and stimulation of formation by mechanical  
471 loading of the modeling rat ulna in vivo. *J Bone Miner Res.* 1995;10(5):683-689.  
472 doi:10.1002/jbmr.5650100503
- 473 23. Bouxsein ML, Boyd SK, Christiansen BA, Guldberg RE, Jepsen KJ, Müller R. Guidelines for assessment  
474 of bone microstructure in rodents using micro-computed tomography. *J Bone Miner Res.*  
475 2010;25(7):1468-1486. doi:10.1002/jbmr.141
- 476 24. Dempster DW, Compston JE, Drezner MK, et al. Standardized nomenclature, symbols, and units for  
477 bone histomorphometry: A 2012 update of the report of the ASBMR Histomorphometry Nomenclature  
478 Committee. *J Bone Miner Res.* 2013;28(1):2-17. doi:10.1002/jbmr.1805
- 479 25. Sadler AM, Bailey SJ. Validation of a refined technique for taking repeated blood samples from juvenile  
480 and adult mice. *Lab Anim.* 2013;47(4):316-319. doi:10.1177/0023677213494366
- 481 26. Upadhyay J, Farr OM, Mantzoros CS. The role of leptin in regulating bone metabolism. *Metabolism.*  
482 2015;64(1):105-113. doi:10.1016/j.metabol.2014.10.021
- 483 27. Ahima, Rexford S., Prabakaran, Daniel, Mantzoros, Christos, Qu, Daqing, Lowell, Bradford, Maratos-  
484 Flier, Eleftheria, Flier JS. Role of leptin in the neuroendocrine response to fasting. *Nature.*  
485 1996;382:250–252.
- 486 28. Ahrén B, Månsson S, Gingerich RL, Havel PJ. Regulation of plasma leptin in mice: Influence of age,  
487 high-fat diet, and fasting. *Am J Physiol - Regul Integr Comp Physiol.* 1997;273(1 42-1).  
488 doi:10.1152/ajpregu.1997.273.1.r113
- 489 29. Trayhurn P, Hoggard N, Mercer JG, Rayner D V. Hormonal and neuroendocrine regulation of energy  
490 balance - The role of leptin. *Arch Anim Nutr.* 1998;51(2-3):177-185. doi:10.1080/17450399809381917
- 491 30. Thomas T, Gori F, Khosla S, Jensen MD, Burguera B, Riggs BL. Leptin acts on human marrow stromal  
492 cells to enhance differentiation to osteoblasts and to inhibit differentiation to adipocytes. *Endocrinology.*  
493 1999;140(4):1630-1638. doi:10.1210/endo.140.4.6637
- 494 31. Hamrick MW, Ferrari SL. Leptin and the sympathetic connection of fat to bone. *Osteoporos Int.*  
495 2008;19(7):905-912. doi:10.1007/s00198-007-0487-9
- 496 32. Fukushima N, Hanada R, Teranishi H, et al. Ghrelin directly regulates bone formation. *J Bone Miner Res.*  
497 2005;20(5):790-798. doi:10.1359/JBMR.041237
- 498 33. Van Der Velde M, Van Der Eerden BCJ, Sun Y, et al. An age-dependent interaction with leptin unmasks  
499 Ghrelin's bone-protective effects. *Endocrinology.* 2012;153(8):3593-3602. doi:10.1210/en.2012-1277
- 500 34. Asakawa A, Inui A, Kaga T, et al. Ghrelin is an appetite-stimulatory signal from stomach with structural  
501 resemblance to motilin. *Gastroenterology.* 2001;120(2):337-345. doi:10.1053/gast.2001.22158



- 502 35. Kojima M, Kangawa K. Ghrelin: Structure and function. *Physiol Rev.* 2005;85(2):495-522.  
503 doi:10.1152/physrev.00012.2004
- 504 36. Thomas DM, Udagawa N, Hards DK, et al. Insulin receptor expression in primary and cultured  
505 osteoclast-like cells. *Bone.* 1998;23(3):181-186. doi:10.1016/S8756-3282(98)00095-7
- 506 37. Cornish J, Callon KE, Reid IR. Insulin increases histomorphometric indices of bone formation in vivo.  
507 *Calcif Tissue Int.* 1996;59(6):492-495. doi:10.1007/s002239900163
- 508 38. Pun KK, Lau P, Ho PWM. The characterization, regulation, and function of insulin receptors on  
509 osteoblast-like clonal osteosarcoma cell line. *J Bone Miner Res.* 1989;4(6):853-862.  
510 doi:10.1002/jbmr.5650040610
- 511 39. Fulzele K, DiGirolamo DJ, Liu Z, Xu J, Messina JL, Clemens TL. Disruption of the insulin-like growth  
512 factor type 1 receptor in osteoblasts enhances insulin signaling and action. *J Biol Chem.*  
513 2007;282(35):25649-25658. doi:10.1074/jbc.M700651200
- 514 40. Bollag RJ, Zhong Q, Phillips P, et al. Osteoblast-derived cells express functional glucose-dependent  
515 insulinotropic peptide receptors. *Endocrinology.* 2000;141(3):1228-1235. doi:10.1210/endo.141.3.7366
- 516 41. Zhong Q, Itokawa T, Sridhar S, et al. Effects of glucose-dependent insulinotropic peptide on osteoclast  
517 function. *Am J Physiol - Endocrinol Metab.* 2007;292(2):543-548. doi:10.1152/ajpendo.00364.2006
- 518 42. Xie D, Zhong Q, Ding KH, et al. Glucose-dependent insulinotropic peptide-overexpressing transgenic  
519 mice have increased bone mass. *Bone.* 2007;40(5):1352-1360. doi:10.1016/j.bone.2007.01.007
- 520 43. Sanz C, Vázquez P, Blázquez C, Barrio PA, Alvarez MDM, Blázquez E. Signaling and biological effects  
521 of glucagon-like peptide 1 on the differentiation of mesenchymal stem cells from human bone marrow.  
522 *Am J Physiol - Endocrinol Metab.* 2010;298(3):634-643. doi:10.1152/ajpendo.00460.2009
- 523 44. Yamada C, Yamada Y, Tsukiyama K, et al. The murine glucagon-like peptide-1 receptor is essential for  
524 control of bone resorption. *Endocrinology.* 2008;149(2):574-579. doi:10.1210/en.2007-1292
- 525 45. Redman LM, Smith SR, Burton JH, Martin CK, Il'yasova D, Ravussin E. Metabolic Slowing and  
526 Reduced Oxidative Damage with Sustained Caloric Restriction Support the Rate of Living and Oxidative  
527 Damage Theories of Aging. *Cell Metab.* 2018;27(4):805-815.e4. doi:10.1016/j.cmet.2018.02.019
- 528 46. Borer KT, Zheng Q, Jafari A, Javadi S, Kernozek T. Nutrient intake prior to exercise is necessary for  
529 increased osteogenic marker response in diabetic postmenopausal women. *Nutrients.* 2019;11(7).  
530 doi:10.3390/nu11071494

### 531 Tables

532 **Table 1 Effect of 2-hour feeding following overnight fast on load-induced cortical bone formation in young**  
533 **adult mice**

| Fed | Fasted Fed<br>2hrs |
|-----|--------------------|
|-----|--------------------|

|                                                   | <b>Loaded</b> | <b>Non-loaded</b> | <b><i>p</i> value</b> | <b>Loaded</b> | <b>Non-loaded</b> | <b><i>p</i> value</b> |
|---------------------------------------------------|---------------|-------------------|-----------------------|---------------|-------------------|-----------------------|
| MS (%)                                            | 1.03 ±0.02    | 0.55±0.06         | < 0.01                | 1.35±0.15     | 0.6±0.05          | < 0.0001              |
| MAR (µm/day)                                      | 2.0±0.13      | 0.33±0.15         | < 0.05                | 4.9±0.8       | 0.07±0.06         | < 0.0001              |
| BFR/BS<br>(µm <sup>3</sup> /µm <sup>2</sup> /day) | 1.04± 0.07    | 0.12±0.06         |                       | 3.57±0.8      | 0.02±0.01         | < 0.0001              |

534 MS = mineralising surface; MAR = mineral apposition rate; BFR/BS = bone formation rate. Values are mean ±  
535 SEM.

536 **Table 2 Serum concentrations of hormones altered during fasting and feeding in young mice**

|                | <b>Fed</b>         |                       |                     | <b><i>p</i> value</b> |
|----------------|--------------------|-----------------------|---------------------|-----------------------|
|                | <b>12:00</b>       | <b>14:00</b>          | <b>15:00</b>        |                       |
| <b>Hormone</b> |                    |                       |                     |                       |
| Ghrelin        | 703±162            | 1493±156              | 1326±119            | < 0.05 <sup>a</sup>   |
| Leptin         | 298±0.1            | 269±25                | 276±25              |                       |
| Insulin        | 929±94             | 1023±133              | 1291±110            |                       |
| GIP            | 54±3               | 50±3                  | 51±2                |                       |
| GLP1           | 8±1                | 7±1                   | 7±1                 |                       |
|                | <b>Fasted Fed</b>  |                       |                     |                       |
| Ghrelin        | 1233±251           | 757±95 <sup>1</sup>   | 1143±48             |                       |
| Leptin         | 95±15 <sup>1</sup> | 437±62                | 601±76 <sup>3</sup> | < 0.0001 <sup>b</sup> |
| Insulin        | 552±0.1            | 2175±303 <sup>2</sup> | 1319±107            | < 0.05 <sup>c</sup>   |
| GIP            | 44±2               | 58±2                  | 56±3                | 0.01 <sup>b</sup>     |
| GLP1           | 7±1                | 10±1                  | 11±1. <sup>1</sup>  | 0.05 <sup>b</sup>     |

537 Two-way ANOVA used to assess the differences within and between the groups. Comparisons of time points  
538 within the same group are indicated as <sup>a</sup>12:00 < 14:00; <sup>b</sup>12:00 < 14:00,15:00; <sup>c</sup>12:00 < 14:00 > 15:00. Comparisons  
539 of same time points between the groups are indicated as <sup>1</sup>*p* < 0.05; <sup>2</sup>*p* < 0.01; <sup>3</sup>*p* < 0.001. Samples were assessed  
540 in duplicate. Results are expressed as pg/ml, mean ± SEM.

541 **Table 3 Serum concentrations of hormones altered during fasting and feeding in aged mice**

|                   | <b>Fed</b>   |              |              | <b>p value</b>      |
|-------------------|--------------|--------------|--------------|---------------------|
|                   | <b>12:00</b> | <b>14:00</b> | <b>15:00</b> |                     |
| <b>Hormone</b>    |              |              |              |                     |
| Ghrelin           | 803±129      | 2272±359     | 2330±209     | 0.01 <sup>a</sup>   |
| Leptin            | 686±123      | 681±115      | 528±84       |                     |
| Insulin           | 1000±99      | 914±87.1     | 1123±131     |                     |
| GIP               | 46±2         | 43.1±1       | 45±2         |                     |
| GLP1              | 6±1          | 7±1          | 6±1          |                     |
| <b>Fasted Fed</b> |              |              |              |                     |
| Ghrelin           | 944±256      | 1862±277     | 1934±327     |                     |
| Leptin            | 292±32       | 832±135      | 935±186      | < 0.05 <sup>a</sup> |
| Insulin           | 570±0.1      | 1458±208     | 800±57       | < 0.05 <sup>b</sup> |
| GIP               | 35±3         | 63±12        | 48±16        |                     |
| GLP1              | 4±1          | 6±1          | 5±1          |                     |

Two-way ANOVA used to assess the differences within and between the groups. Comparisons of time points within the same group are indicated as <sup>a</sup>12:00 < 14:00,15:00; <sup>b</sup>14:00 > 15:00. Samples were assessed in duplicate. Results are expressed as pg/ml, mean ± SEM.

### Figure legends

#### Figure 1 Feeding behaviour of young and aged male C57BL/6 mice

**a** In total 14 mice were randomly divided into two groups; control ad-lib fed ( $n = 7$ ) or overnight 16-hour fasted ( $n = 7$ ) at 17 weeks of age. **b** In total 16 male mice were randomly divided into two groups; ad-lib fed ( $n = 8$ ) or 16-hour fasted ( $n = 8$ ) at 20 months of age. The body weights of mice were measured for 7 hrs following overnight fast to monitor food intake of the animals. Following overnight food restriction, fasted mice consumed more food compared with the mice in the control group that had free access to food ad libitum. The body weights of both young adult and aged mice in the fasted group increased significantly for 2 hrs compared with their pre-fasted body weights indicating rapid ingestion of food (and water) in the early re-feeding period. The proportions of the starting pre-fasted body weights (%) ± SEM are shown. \* indicates significant differences between fed and fasted fed groups; \*  $p < 0.05$ , \*\*  $p < 0.01$ , \*\*\*\*  $p < 0.0001$  by two-way ANOVA with Tukey post-hoc test

#### Figure 2 Cortical bone phenotype of control (non-loaded) and loaded tibiae with 2200 microstrain (maximal) loading regimen in 19-week-old fed or overnight fasted 2-hour fed male C57BL/6 mice

**a** Three-dimensional images of a 1.0-mm-thick cortical bone region 0.9mm below the growth plate from the mid-shaft of control non-loaded (left) and loaded (right) tibiae of fed or fasted 2-hour fed mice. **b** Transverse cortical

bone confocal microscope images from the mid-shaft of left non-loaded and right loaded tibiae of fed (top) or fed for 2 hours following overnight fast (bottom) male mice. Double calcein labels can be visualised on endocortical and periosteal surfaces of the loaded tibiae confirming new bone formation at these sites. **c** The change in cortical bone thickness (Ct.Th) of tibiae loaded at 13N to induce peak strain magnitude of 2200 microstrain compared with non-loaded controls of fed or fasted 2-hour fed young adult male mice measured using  $\mu$ CT at tibial mid-shaft. Fasted 2-hour fed mice had significantly greater response in Ct.Th of the right tibiae compared with ad-libitum fed mice. Scale bar = 200 $\mu$ m. **d** Three-dimensional visualisation and representative colour-coded images of the cortical bone thickness of non-loaded and loaded tibiae of fed and fasted 2-hour fed young adult mice. All data are means  $\pm$  SEM.  $n = 7$  fed mice,  $n = 6$  fasted 2-hour fed mice. **c** Two-tailed Student's  $t$ -test; \*  $p < 0.05$

**Figure 3 Cortical bone phenotype of control (non-loaded) and loaded tibiae with 1100 microstrain (sub-threshold) and 1300 microstrain (submaximal) loading regimens in 19-week-old fed or overnight fasted 2-hour fed male C57BL/6 mice**

**a** The effect of sub-threshold and **b** submaximal mechanical loadings with peak force of 8N to induce peak strain magnitude of 1100 microstrain and 11N to induce peak strain magnitude of 1300 microstrain respectively on Ct.Th of fed or fasted 2-hour fed young adult mice. All data are means  $\pm$  SEM,  $n = 7$ . **a, b** Two-way ANOVA with post-hoc Tukey comparisons; \*  $p < 0.05$ , \*\*  $p < 0.01$

**Figure 4 Cortical and trabecular bone phenotypes of control (non-loaded) and loaded tibiae with 2200 microstrain osteogenic loading regimen in 20-month-old fed or overnight fasted 2-hour fed male C57BL/6 mice**

**a** Three-dimensional images of a 1.0-mm-thick cortical bone region 0.9mm below the growth plate from the mid-shaft of control non-loaded (left) and loaded (right) tibiae of fed or fasted 2-hour fed aged mice; scale bar = 200 $\mu$ m. **b** The change in cortical bone thickness (Ct.Th) of tibiae loaded at 10N to induce peak strain magnitude of 2200 microstrain compared with non-loaded controls of fed or fasted 2-hour fed aged male mice measured using  $\mu$ CT at tibial mid-shaft. There was no significant difference in Ct.Th of the loaded tibiae of fasted 2-hour fed mice compared with ad-libitum fed mice. **c** Three-dimensional visualisation and representative colour-coded images of the cortical bone thickness of non-loaded and loaded tibiae of fed and fasted 2-hour fed aged adult mice. **d** Trabecular bone pattern factor (Tb.Pf) of the right tibiae loaded at 10N to induce peak strain magnitude of 2200 microstrain compared with non-loaded left controls of fed or fasted 2-hour fed aged male mice measured at tibial proximal region using  $\mu$ CT. Box-plots represent means  $\pm$  SEM.  $n = 8$ . **b** Two-tailed Student's  $t$ -test **d** Two-way ANOVA with post-hoc Tukey comparisons; \*\*  $p < 0.01$ , \*\*\*  $p < 0.001$

**Figure 5 Serum concentrations of ghrelin, leptin, insulin, GIP and GLP1 in young adult 17-week-old and aged 20-month-old fed or overnight fasted 2-hour fed male C57BL/6 mice**

592 **a** Serum ghrelin concentration significantly increased from 12:00 to 14:00 in young fed mice and declined at  
593 14:00 in young fasted fed mice compared with that in fed mice. **b** Serum ghrelin concentrations were significantly  
594 higher at 14:00 and 15:00 compared to those at 12:00 in aged fed but not fasted fed mice. **c, d** In young and aged  
595 fasted fed mice, serum leptin concentrations significantly increased at 14:00 and 15:00 compared with fasting  
596 serum concentration at 12:00 and remained relatively unchanged in ad-lib fed mice. Concentrations of serum  
597 leptin was significantly lower at 12:00 and significantly higher at 15:00 in young fasted fed mice compared to  
598 those in ad-lib fed mice (c). **e** Serum insulin concentrations significantly increased from 12:00 to 14:00 in young  
599 fasted fed mice and in comparison to that in ad-lib fed mice, then significantly decreased at 15:00. **f** In aged fasted  
600 fed mice, serum insulin concentrations increased but not significantly from 12:00 to 14:00, then decreased  
601 significantly at 15:00 compared with that at 14:00 and remained unchanged in fed mice. **g, i** In young fasted fed  
602 mice, serum GIP and GLP1 concentrations significantly increased at 14:00 and 15:00 compared with fasting  
603 concentrations at 12:00 and remained unchanged in fed mice. Serum GLP1 concentrations were significantly  
604 higher at 15:00 in fasted fed mice compared to that in ad-lib fed mice (i). **h, j** There were no significant changes  
605 in serum GIP and GLIP1 concentrations within and between aged fed and fasted fed mice. All data are means  $\pm$   
606 SEM.  $n = 6$  ad-libitum fed mice,  $n = 7$  overnight (16-hour) fasted 2-hour fed mice. Two-way ANOVA with post-  
607 hoc Tukey comparisons; \*  $p < 0.05$ , \*\*  $p < 0.01$ , \*\*\*  $p < 0.001$ , \*\*\*\*  $p < 0.0001$

a

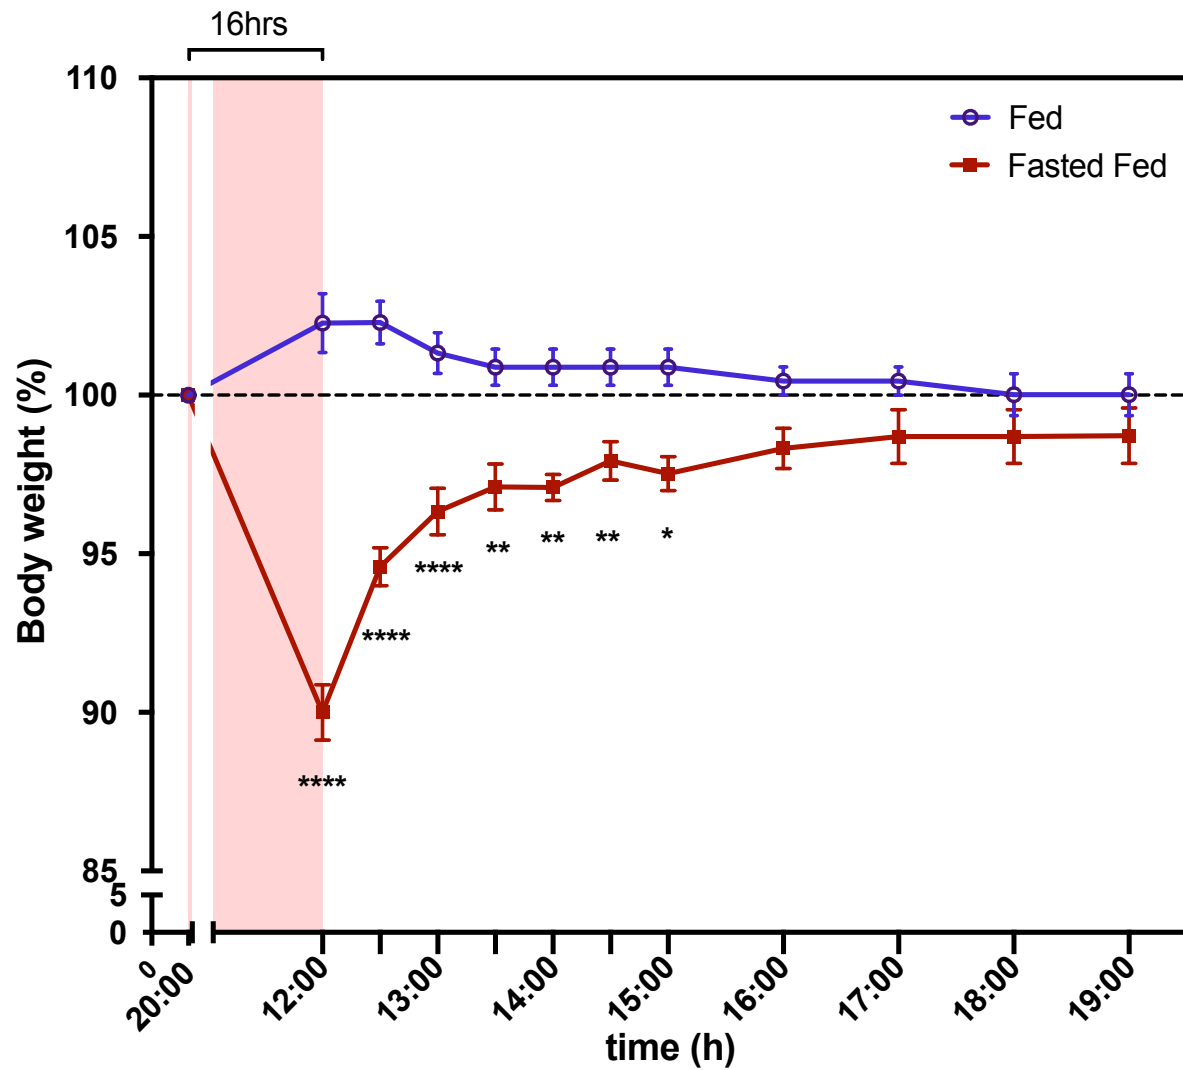

b

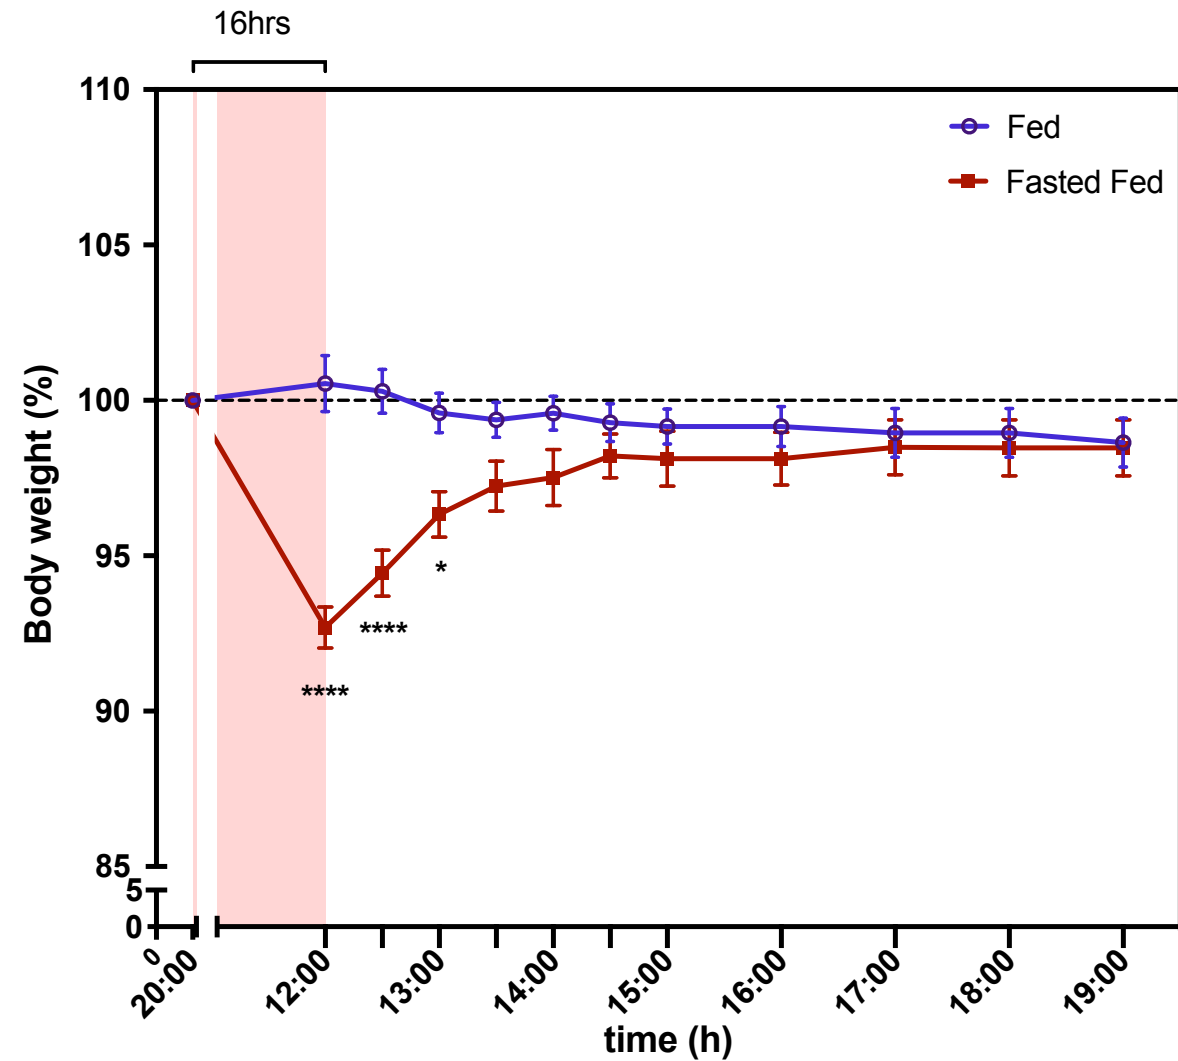

**a**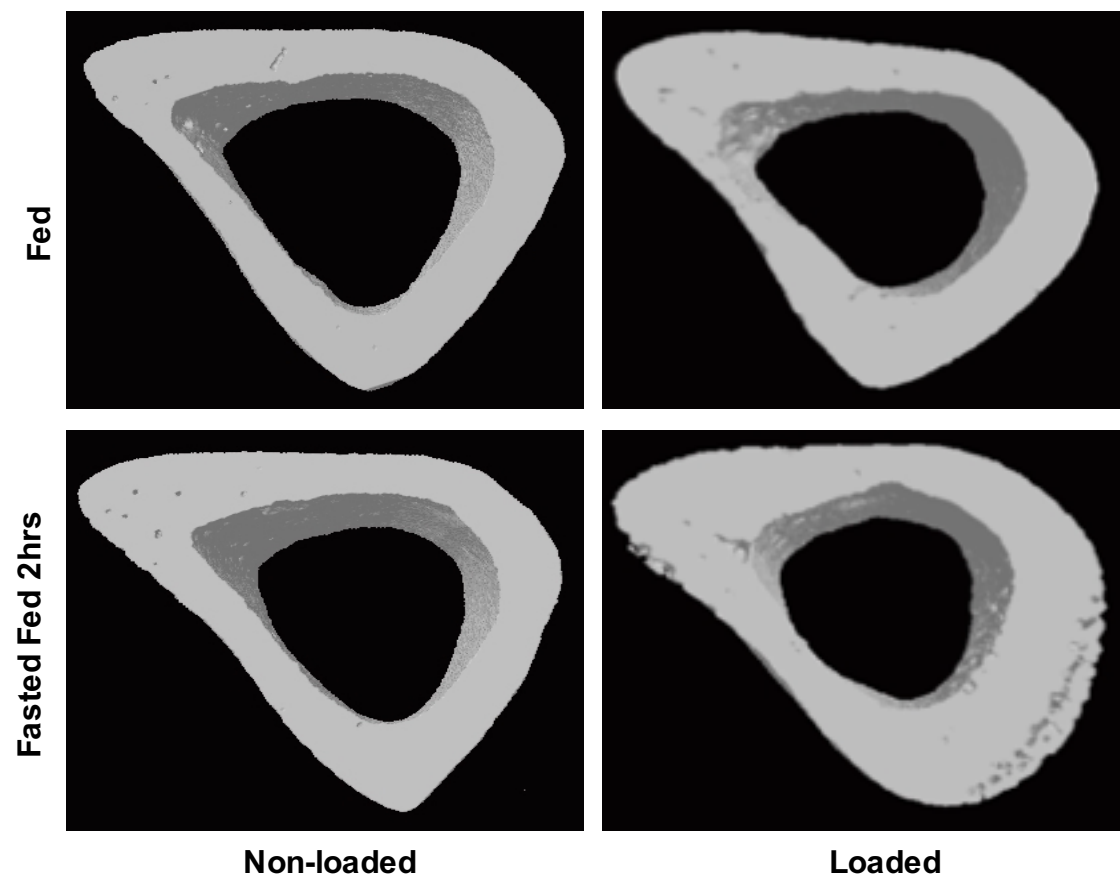**b**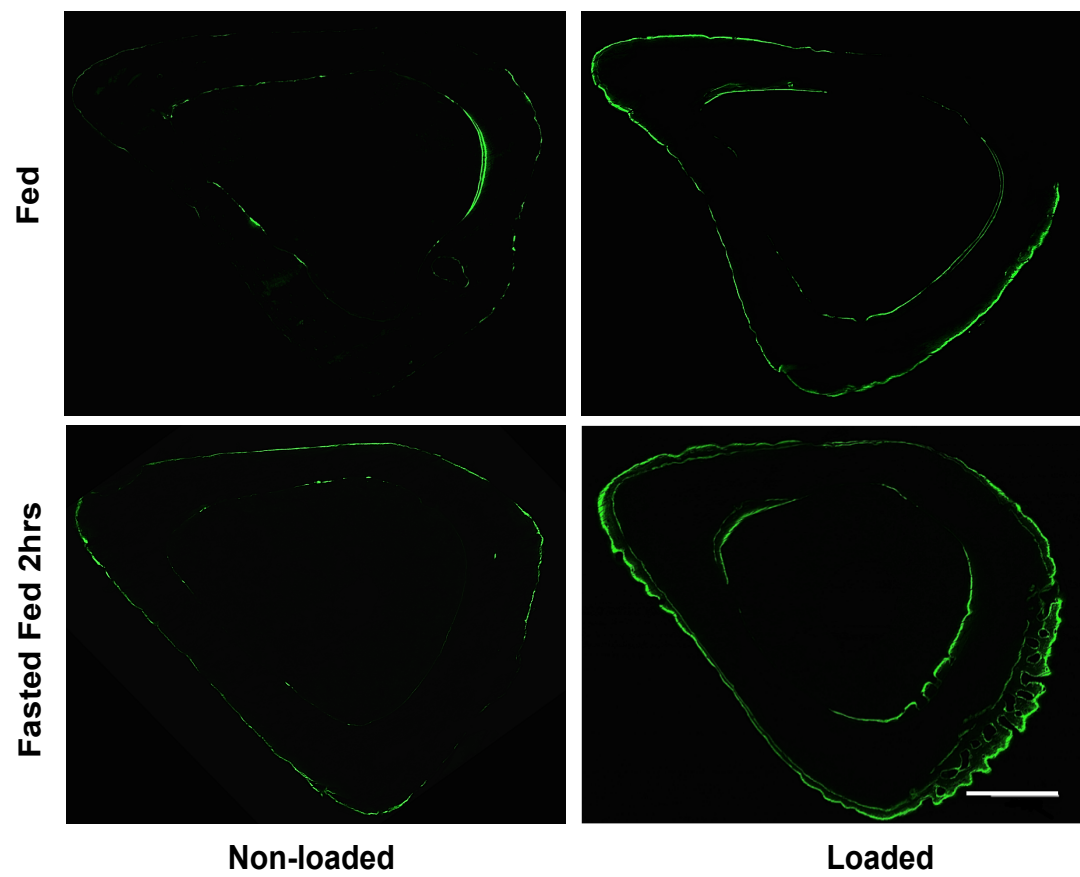**c**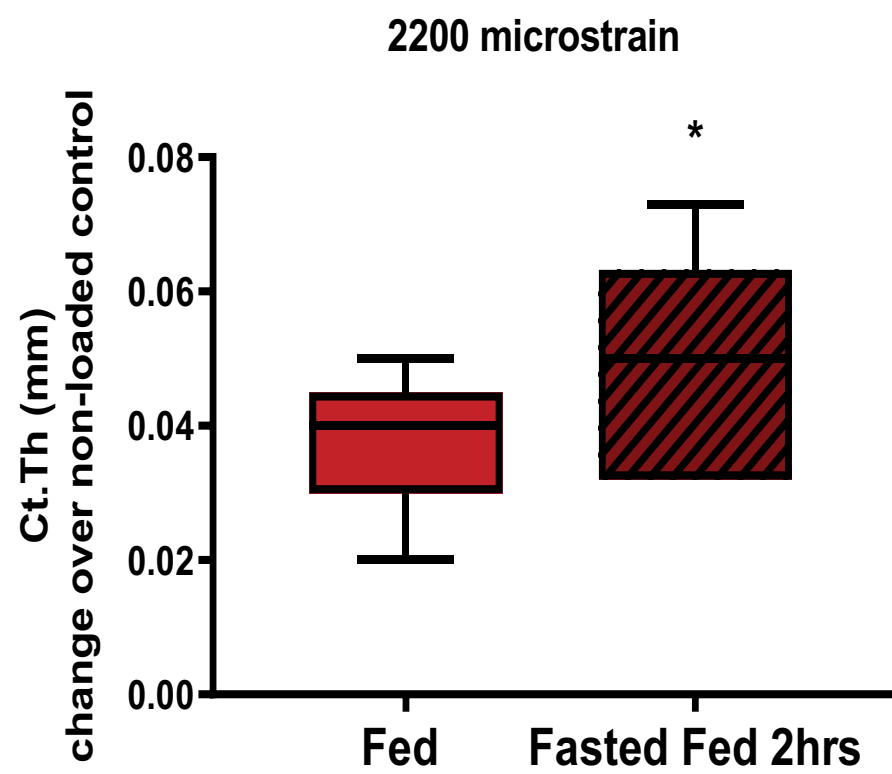**d**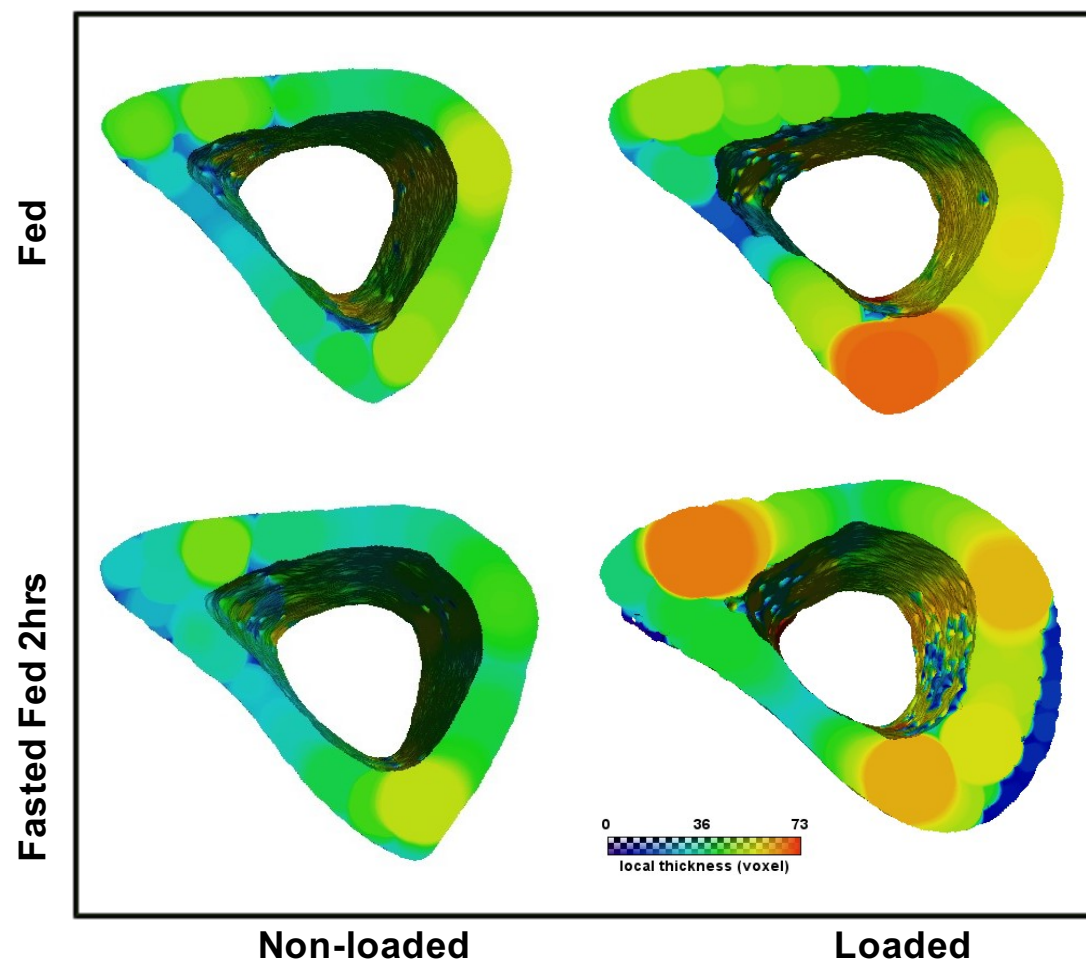

**a**

Left Control  
Right Loaded

**1100 microstrain**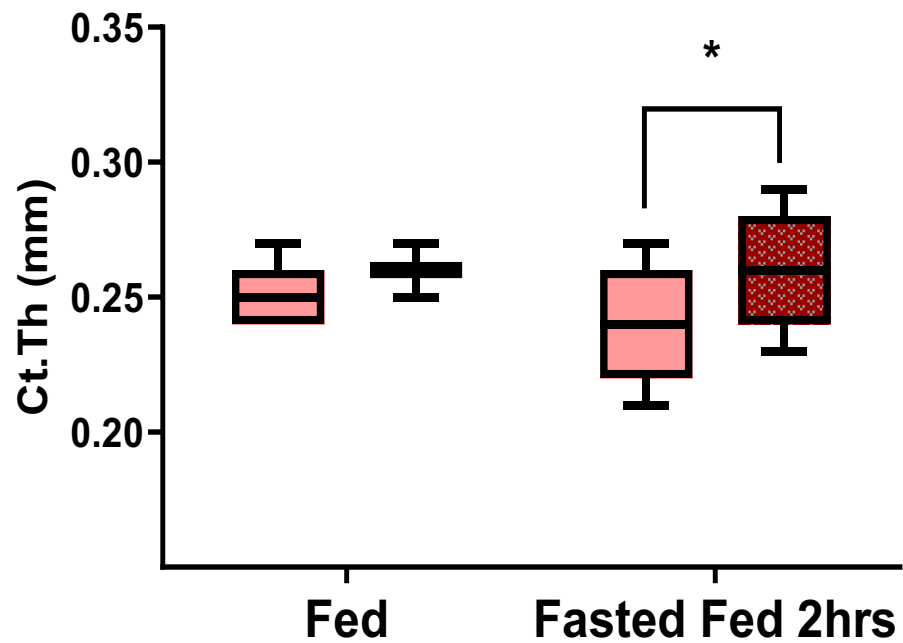**b****1300 microstrain**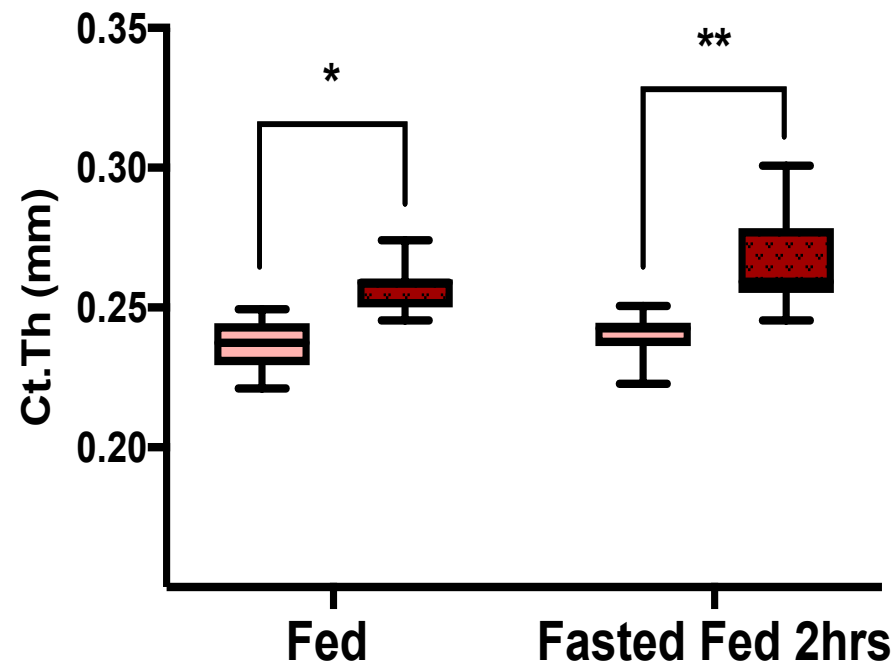



**a**

bioRxiv preprint doi: <https://doi.org/10.1101/2020.12.27.424485>; this version posted February 24, 2021. The copyright holder for this preprint (which was not certified by peer review) is the author/funder, who has granted bioRxiv a license to display the preprint in perpetuity. It is made available under aCC-BY-NC-ND 4.0 International license.

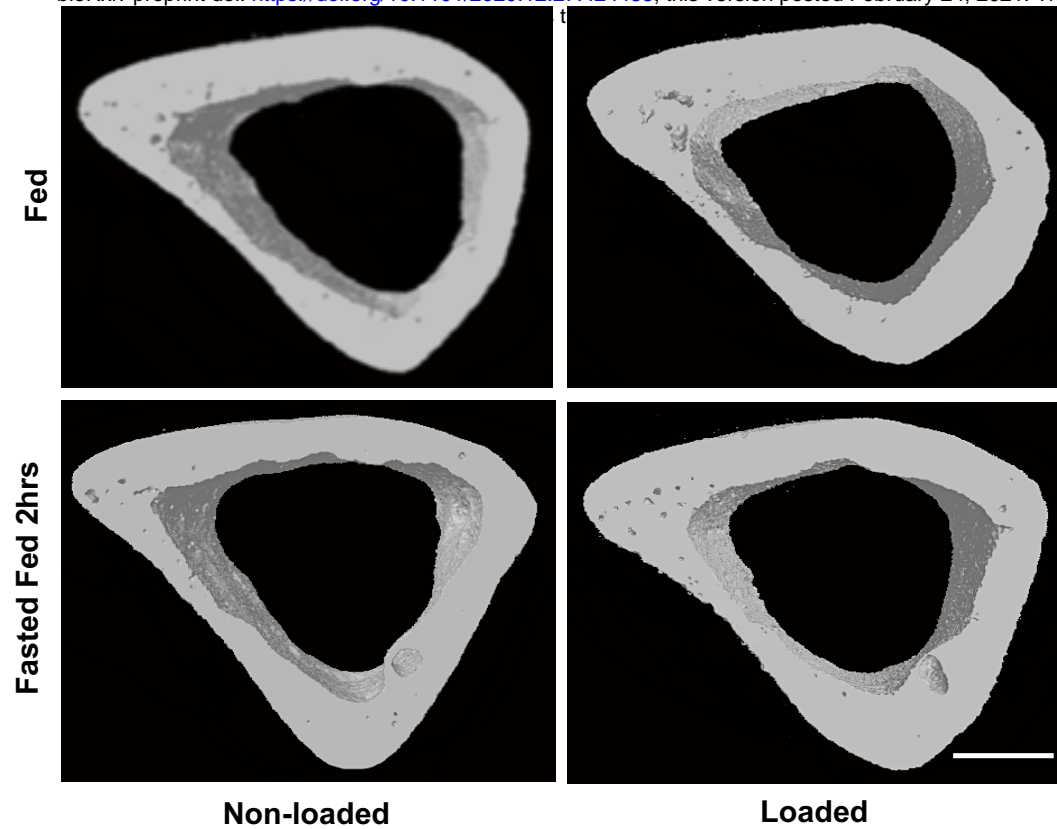**b**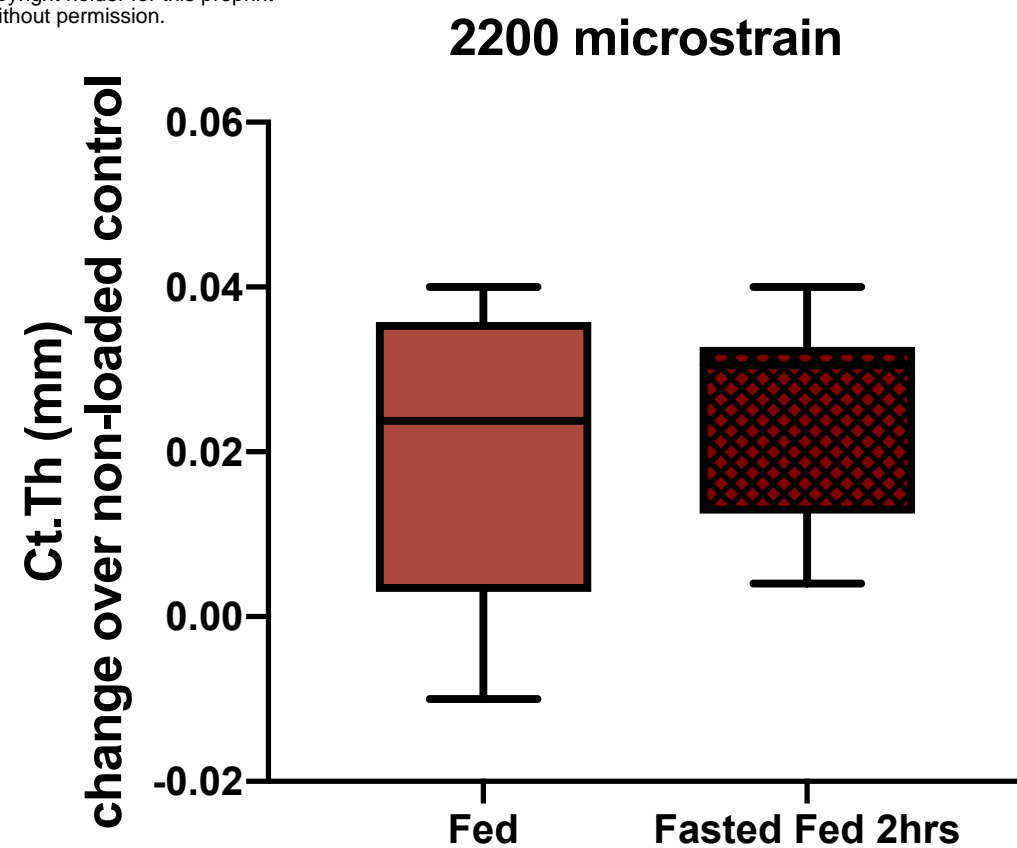**c**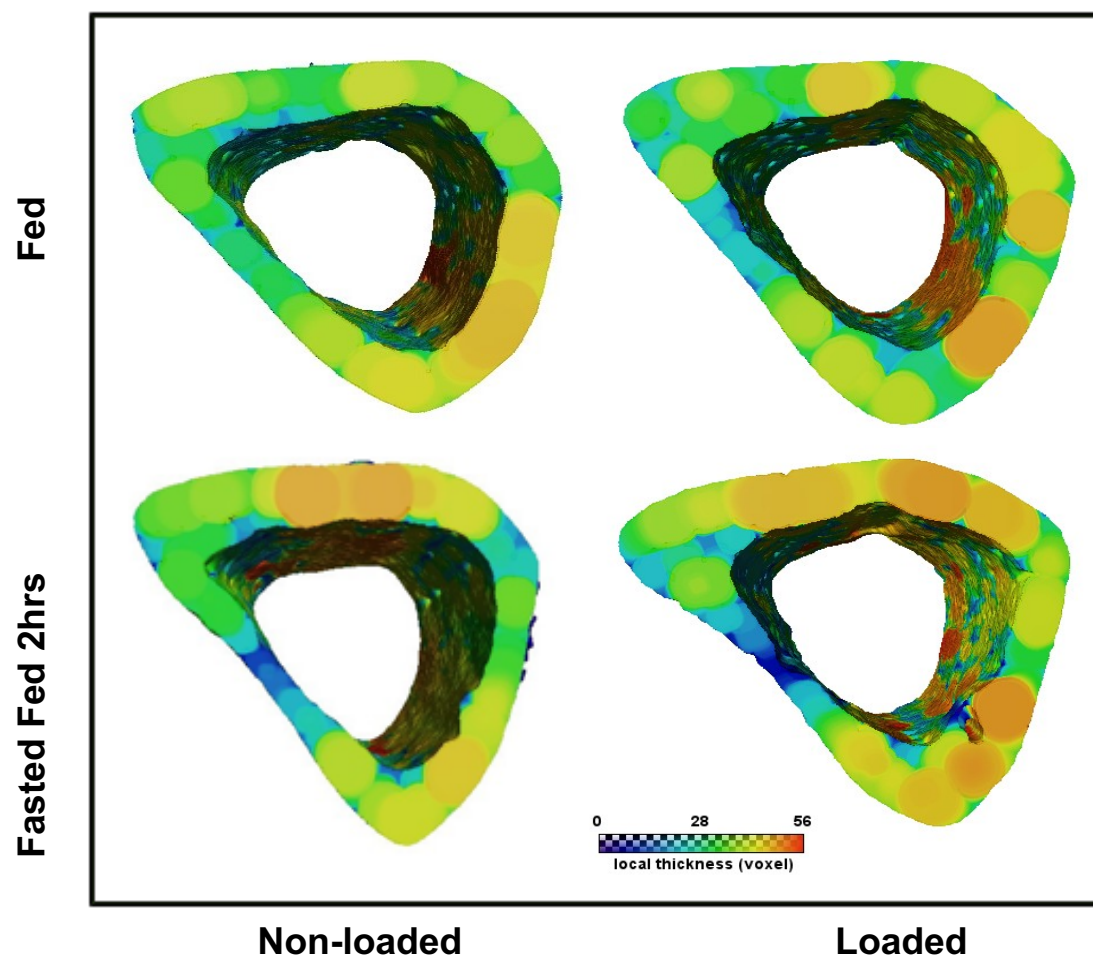**d**

Left Control  
Right Loaded

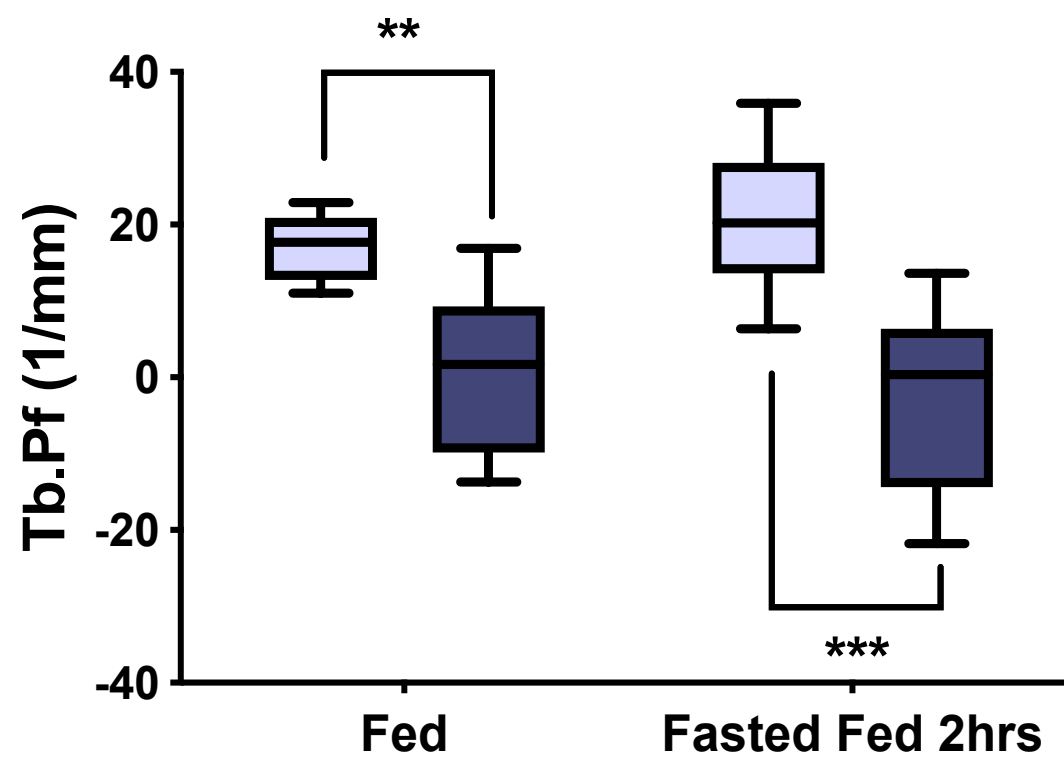

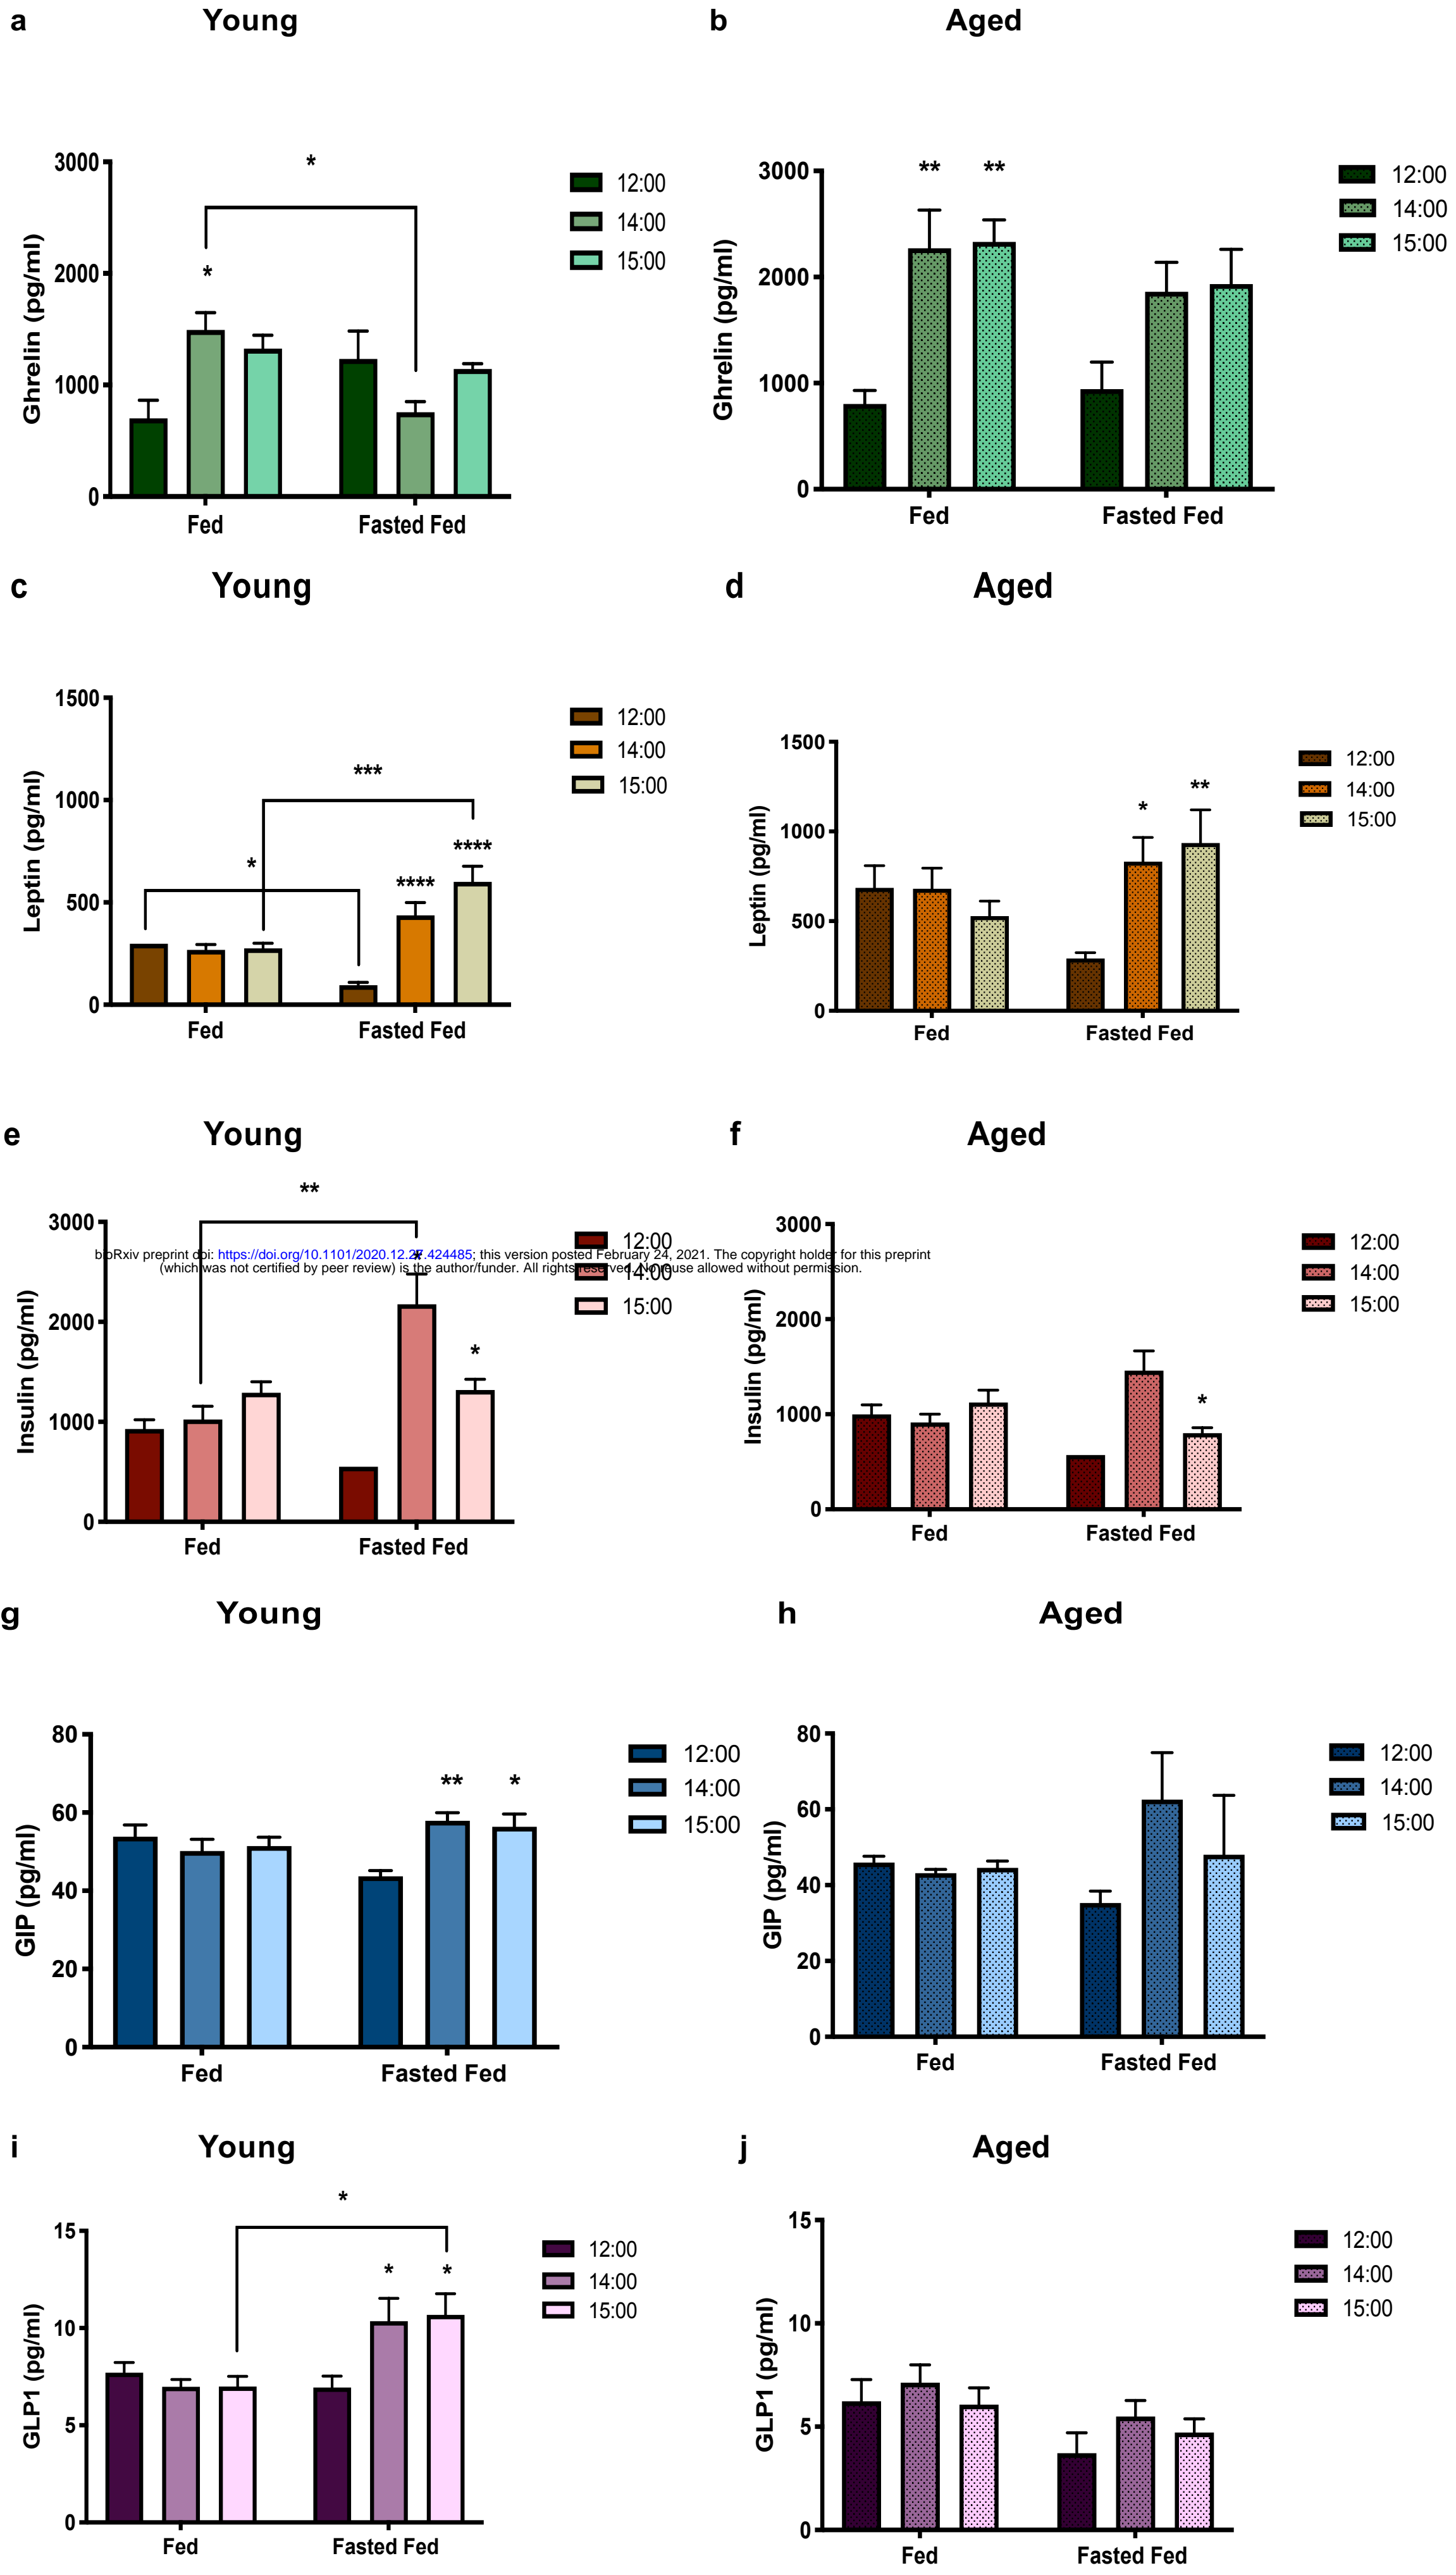

Source: https://www.biorxiv.org/content/10.1101/2020.12.27.424485v3.full.pdf
